# Supplementary material for: S-GRAS score for prognostic classification of adrenocortical carcinoma: an international, multicenter ENSAT study
Source: PubMed Central journal article supplement (PMC8679848; doi:10.1530/eje-21-0510), 2021-10-27

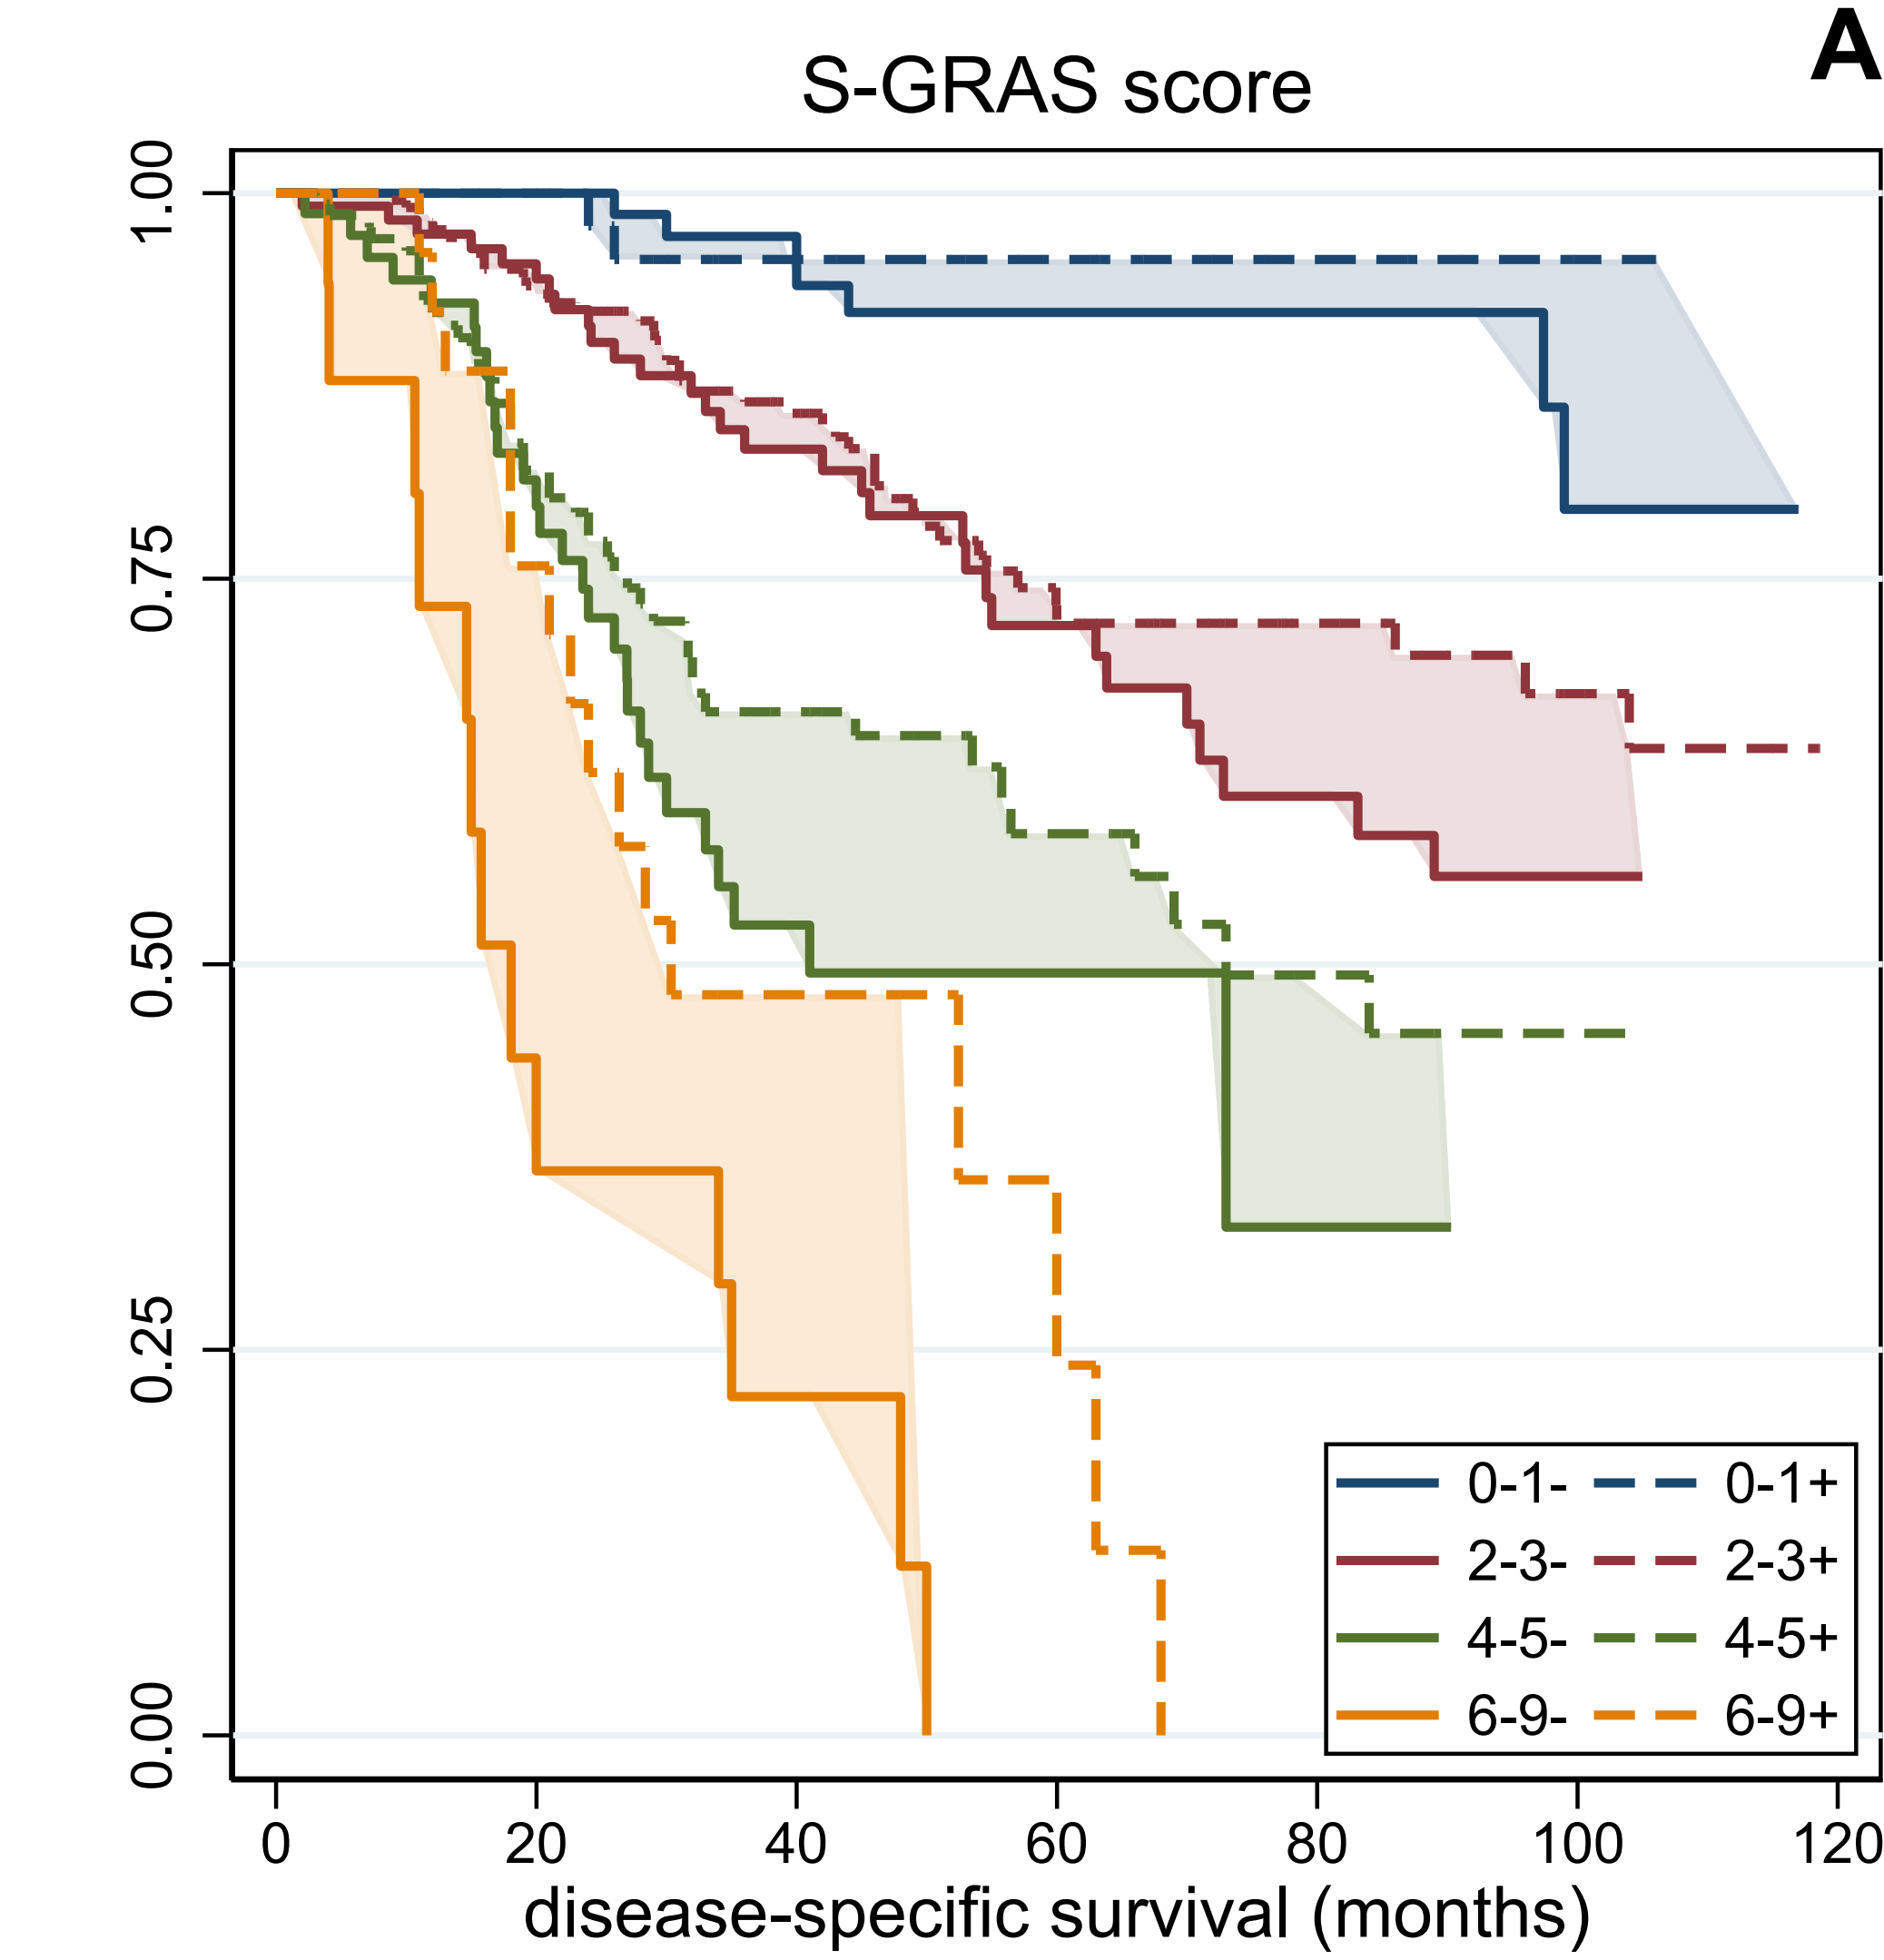

| No. at risk | 0-1- | 0-1+ | 2-3- | 2-3+ | 4-5- | 4-5+ | 6-9- | 6-9+ |
|-------------|------|------|------|------|------|------|------|------|
| 0-1-        | 98   | 68   | 238  | 144  | 31   |      |      |      |
| 0-1+        | 77   | 53   | 172  | 92   | 18   |      |      |      |
| 2-3-        | 61   | 35   | 115  | 52   | 7    |      |      |      |
| 2-3+        | 37   | 26   | 63   | 24   | 3    |      |      |      |
| 4-5-        | 22   | 18   | 40   | 13   | 0    |      |      |      |
| 4-5+        | 12   | 13   | 22   | 4    | 0    |      |      |      |
| 6-9-        | 6    | 2    | 3    | 0    | 0    |      |      |      |
| 6-9+        | 0    | 0    | 0    | 0    | 0    |      |      |      |

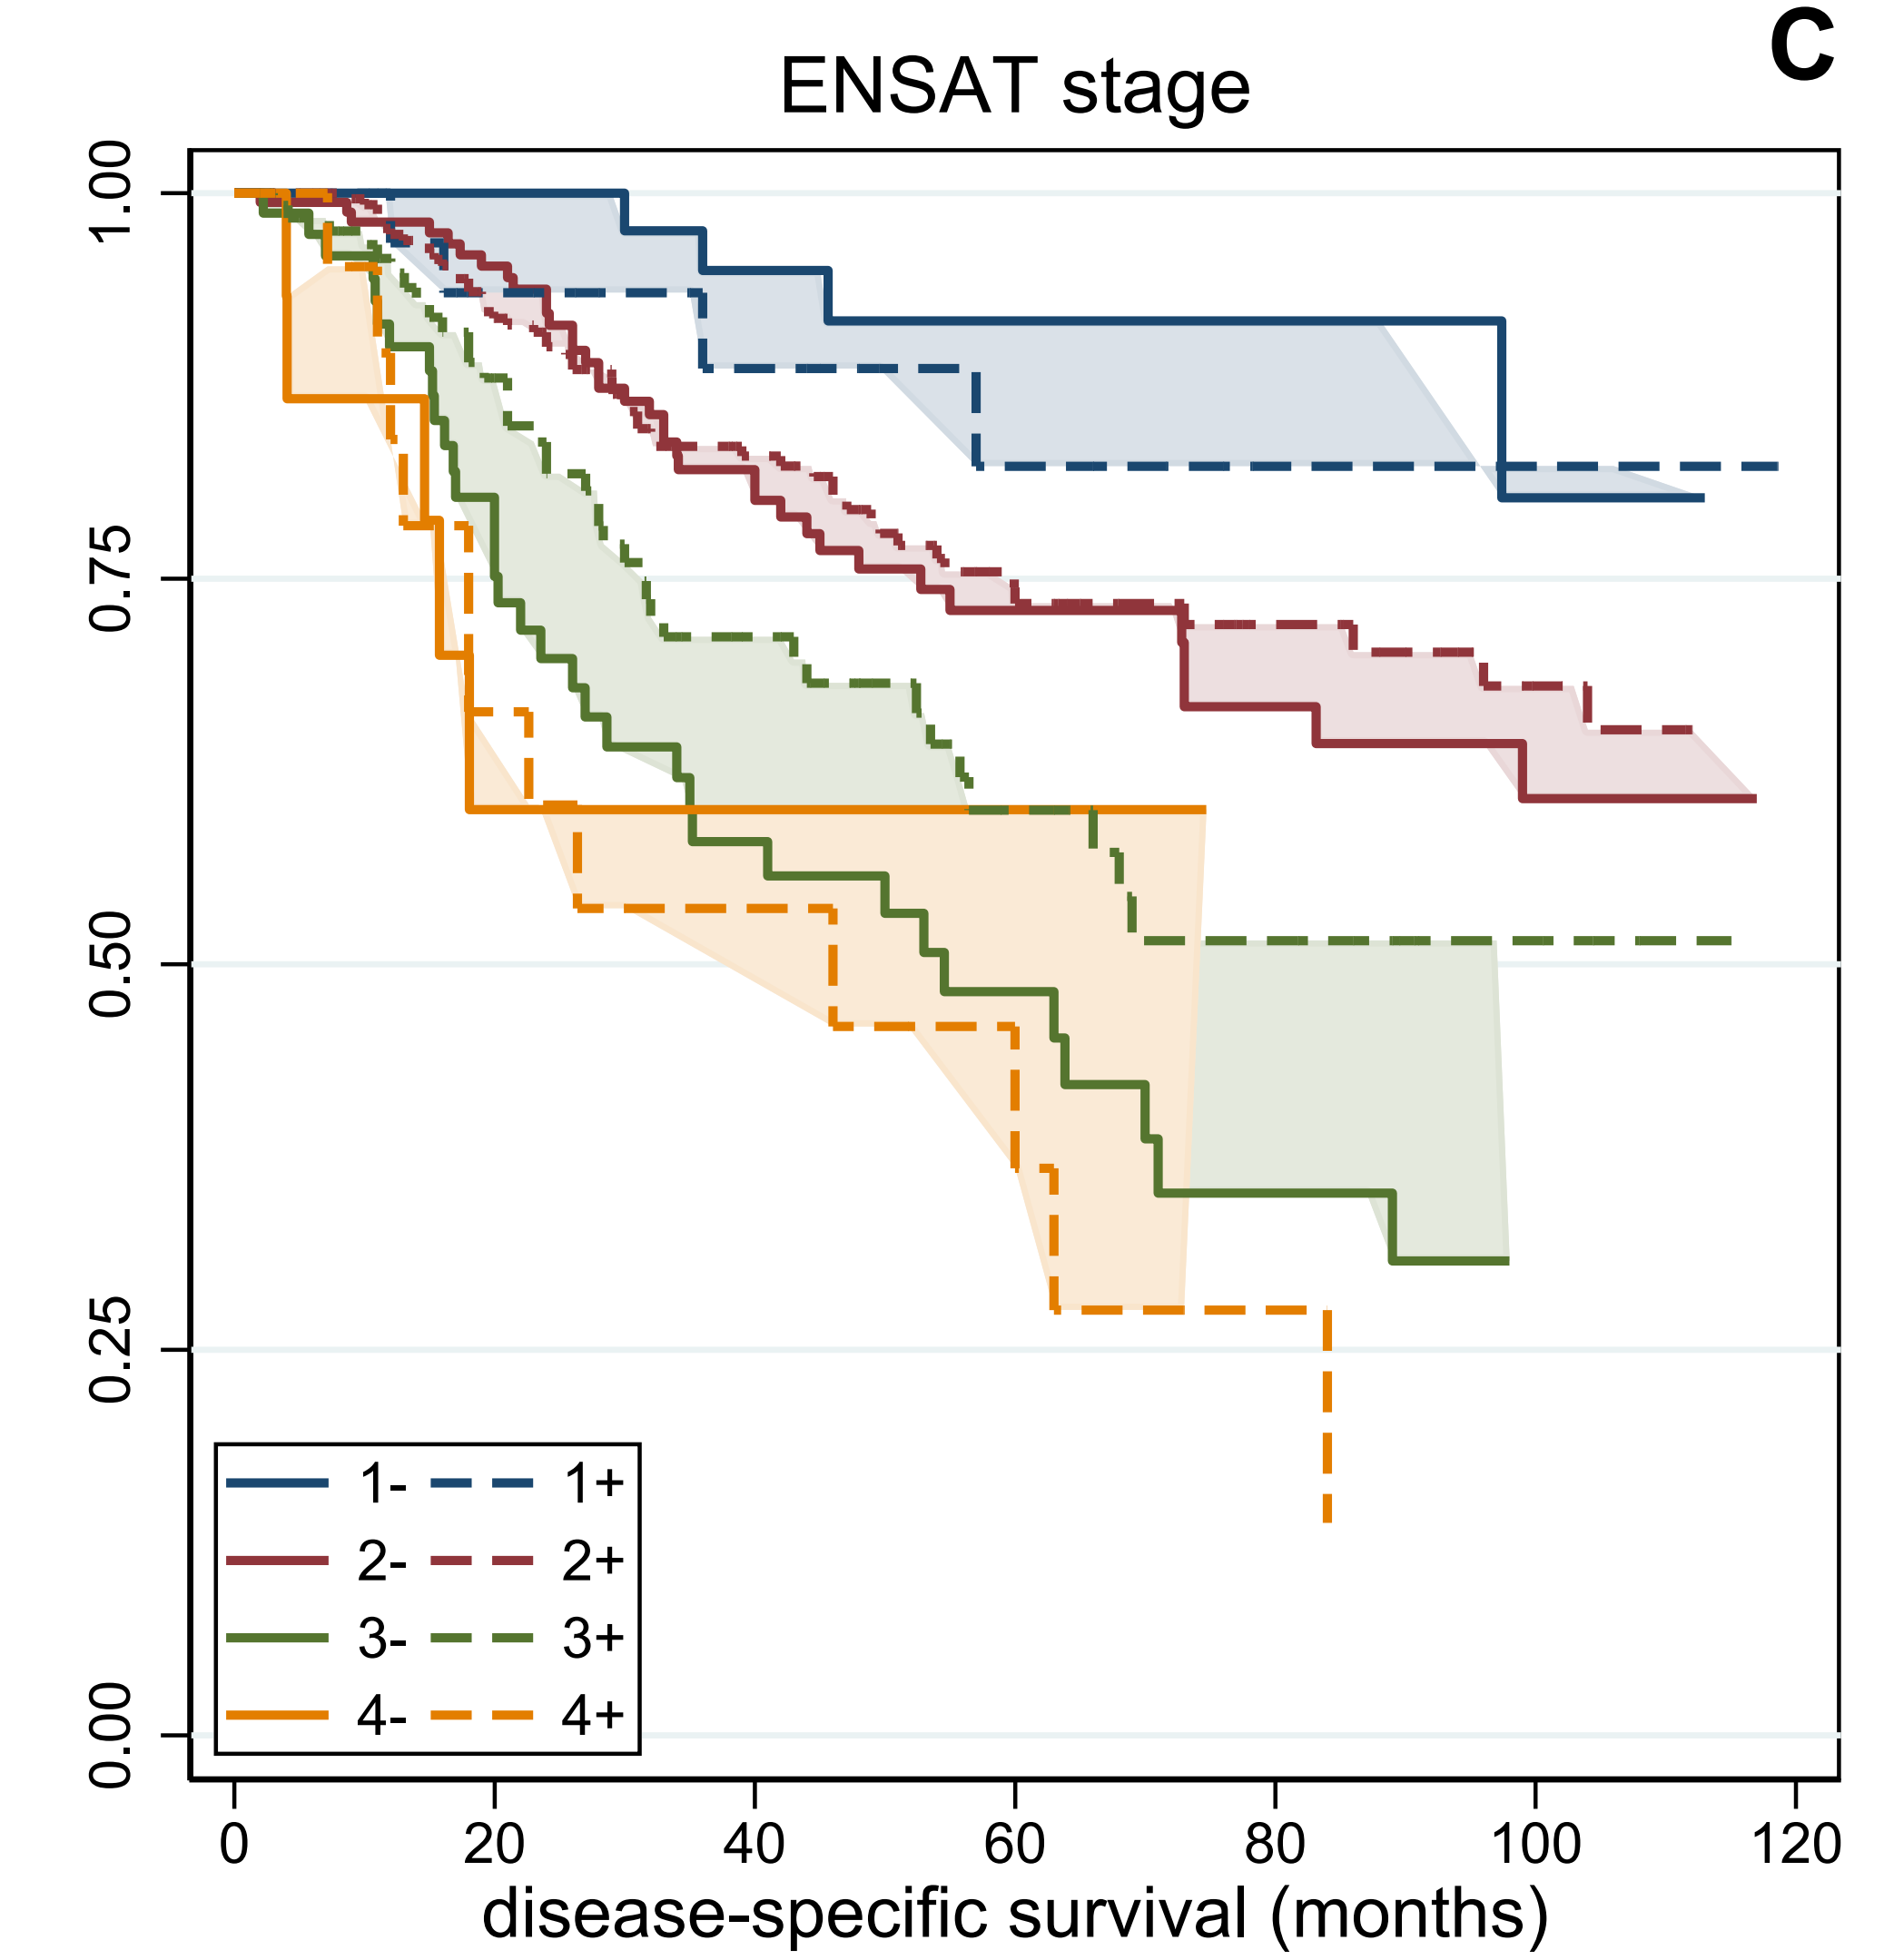

| No. at risk | 1- | 1+ | 2-  | 2+  | 3- | 3+ | 4- | 4+ |
|-------------|----|----|-----|-----|----|----|----|----|
| 1-          | 47 | 38 | 291 | 130 | 22 |    |    |    |
| 1+          | 44 | 27 | 211 | 86  | 11 |    |    |    |
| 2-          | 33 | 18 | 132 | 52  | 7  |    |    |    |
| 2+          | 15 | 12 | 72  | 27  | 5  |    |    |    |
| 3-          | 11 | 5  | 47  | 17  | 2  |    |    |    |
| 3+          | 6  | 3  | 26  | 9   | 1  |    |    |    |
| 4-          | 3  | 1  | 5   | 2   | 1  |    |    |    |
| 4+          | 0  | 0  | 0   | 0   | 0  |    |    |    |

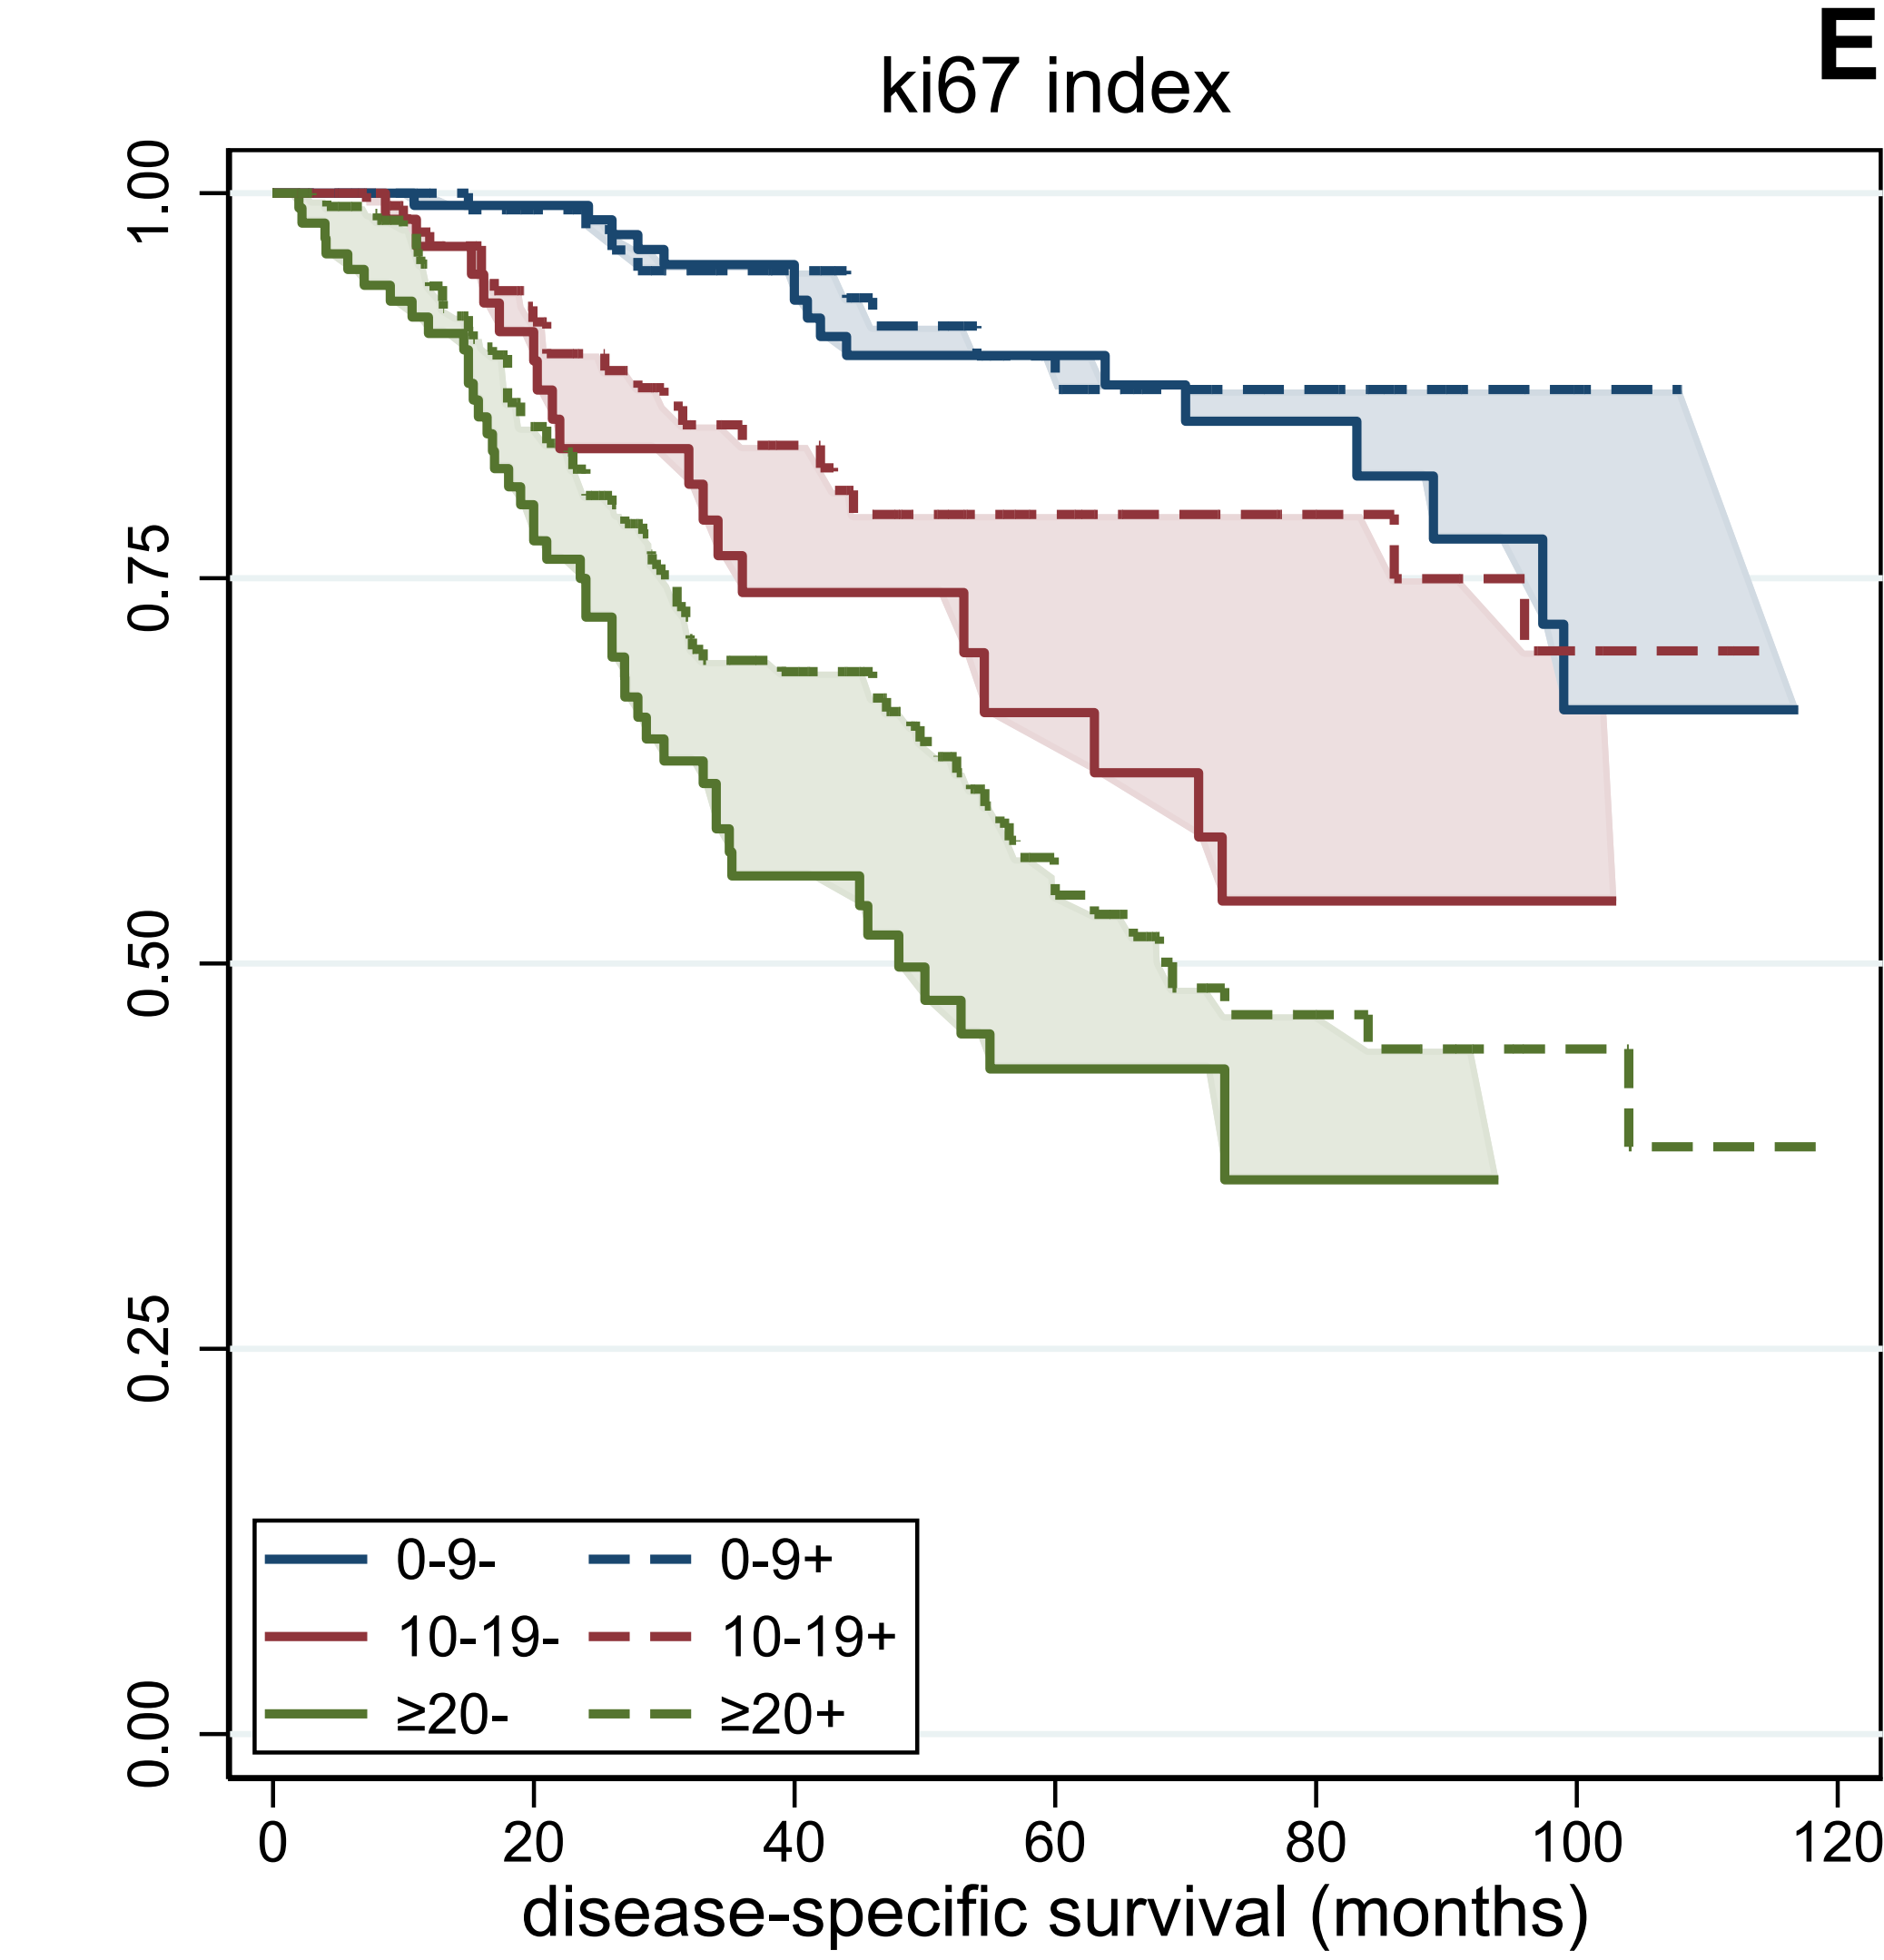

| No. at risk | 0-9- | 0-9+ | 10-19- | 10-19+ | ≥20- | ≥20+ |
|-------------|------|------|--------|--------|------|------|
| 0-9-        | 141  | 112  | 130    | 130    | 239  |      |
| 0-9+        | 111  | 85   | 90     | 90     | 160  |      |
| 10-19-      | 83   | 58   | 59     | 59     | 92   |      |
| 10-19+      | 52   | 41   | 30     | 30     | 45   |      |
| ≥20-        | 28   | 28   | 21     | 21     | 22   |      |
| ≥20+        | 12   | 18   | 13     | 13     | 8    |      |
|             | 5    | 15   | 9      | 9      | 3    |      |

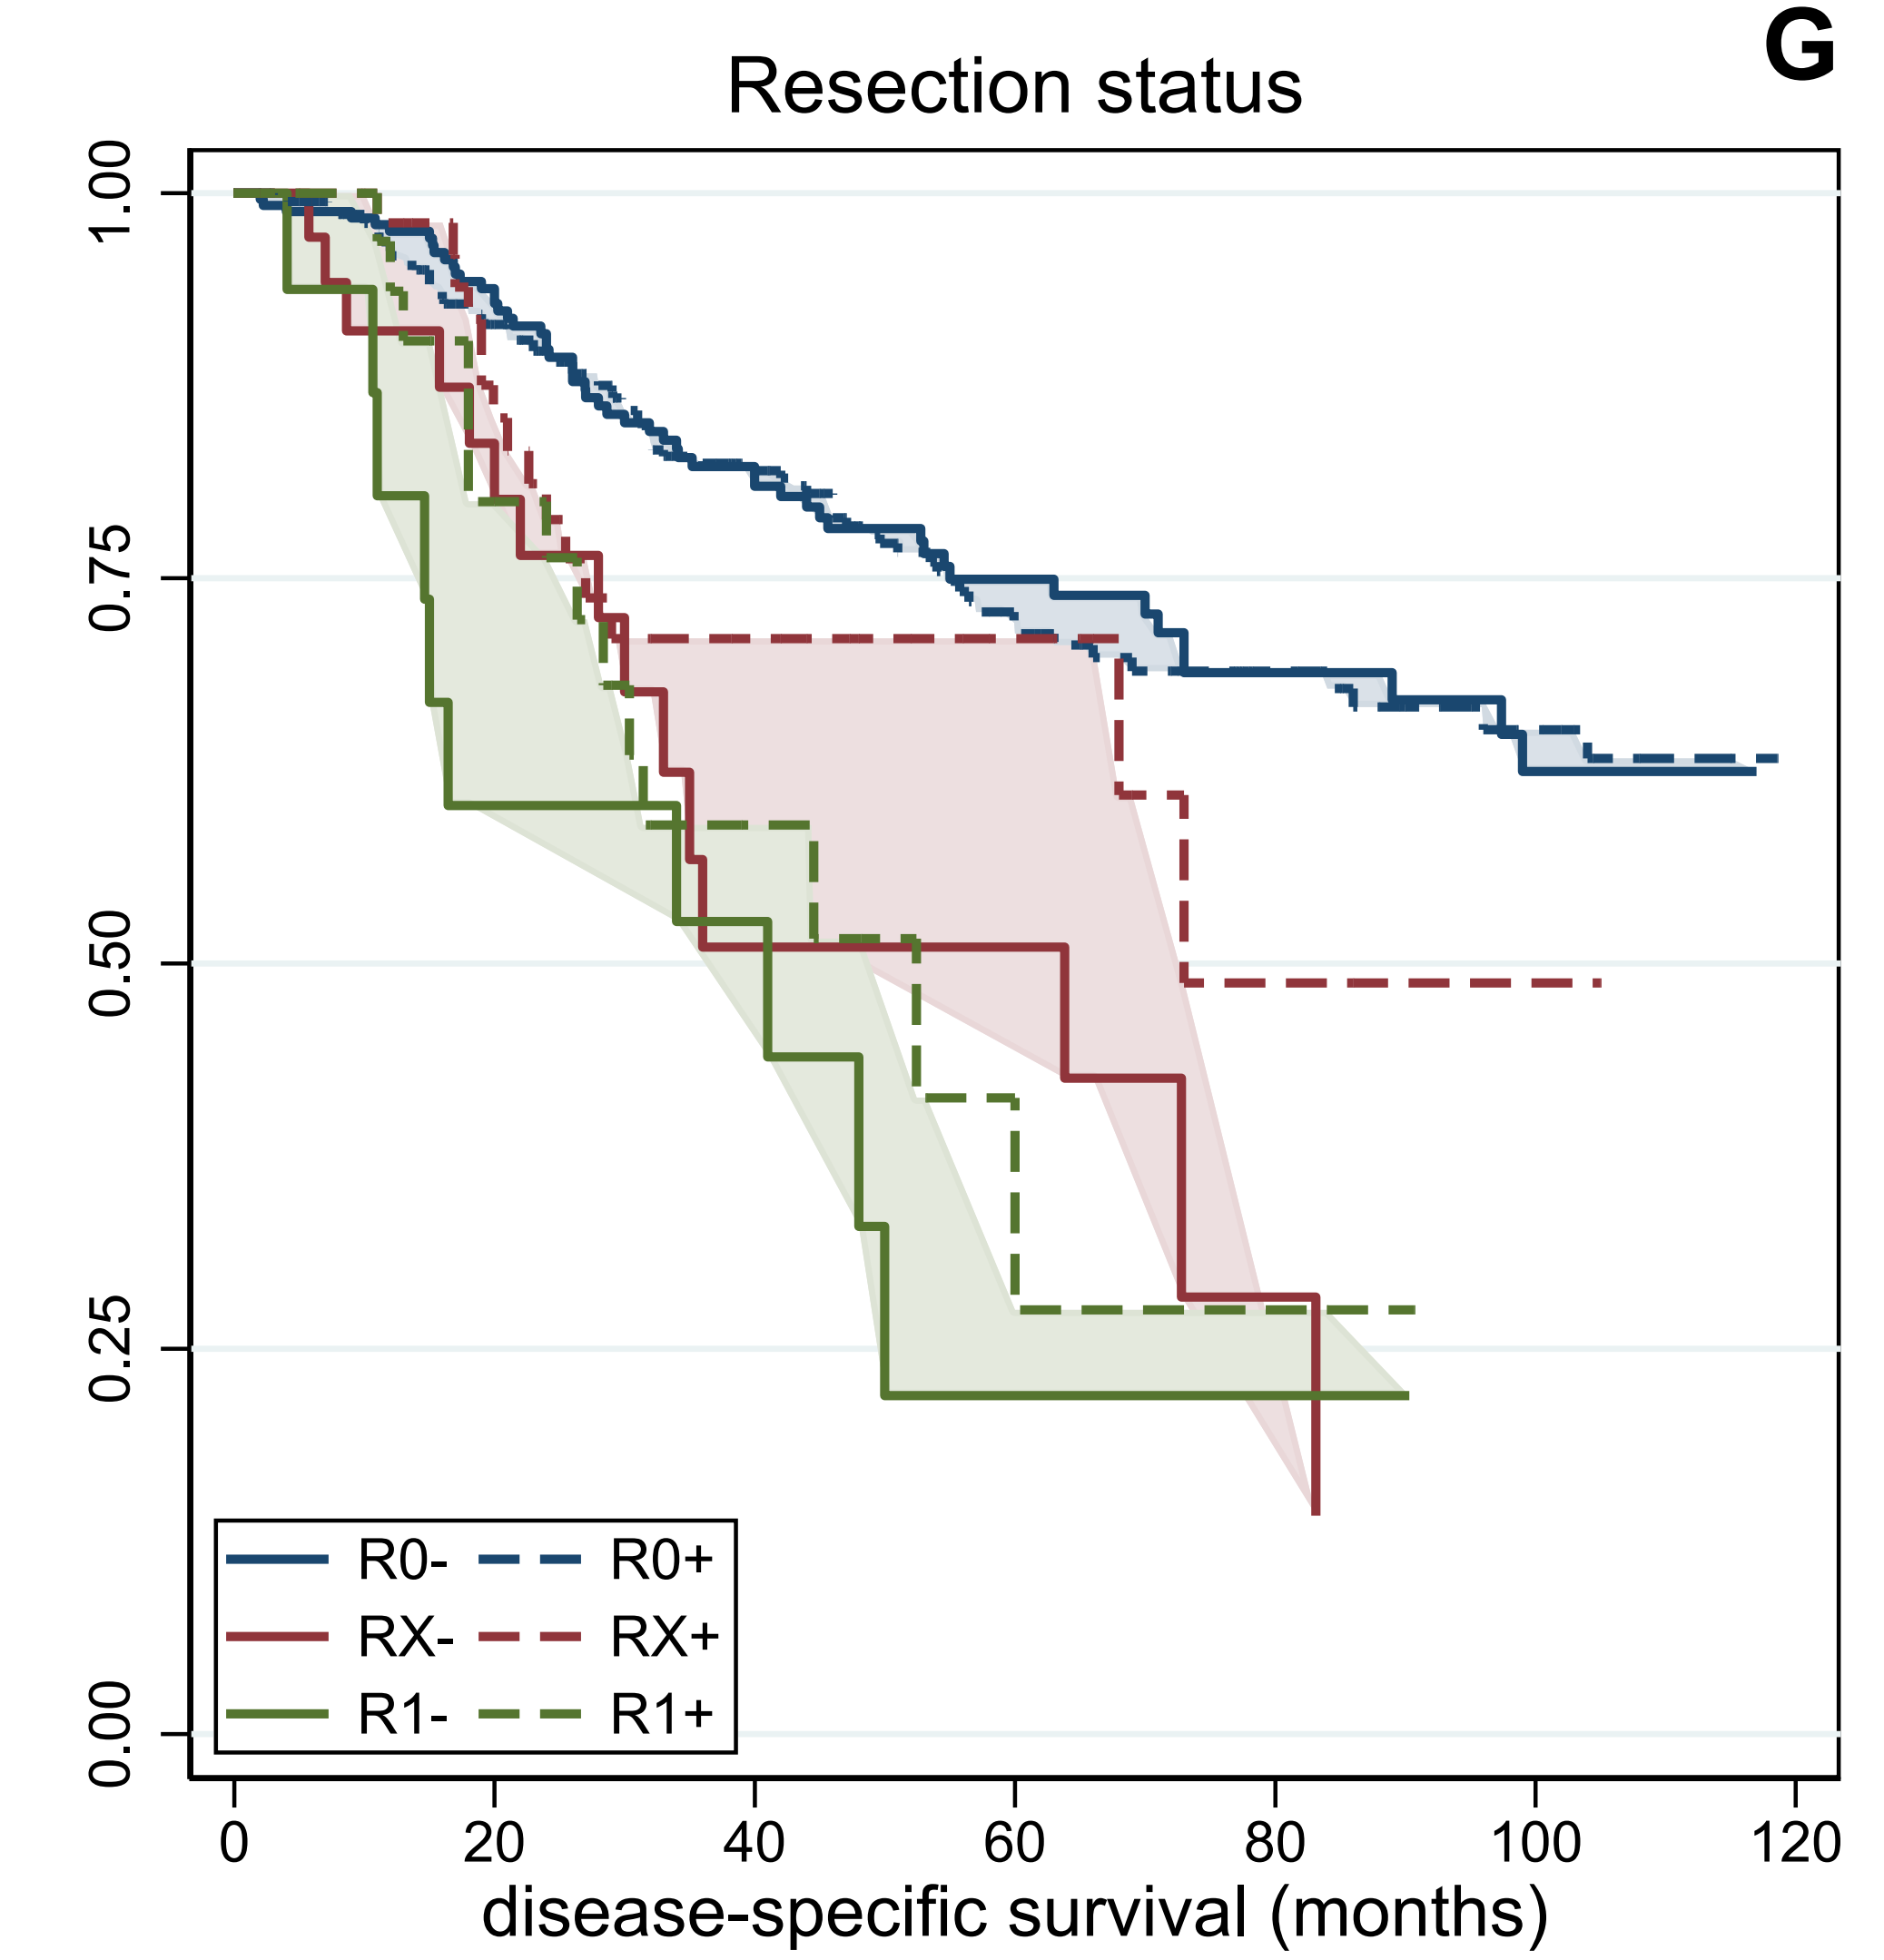

| No. at risk | R0- | R0+ | RX- | RX+ | R1- | R1+ |
|-------------|-----|-----|-----|-----|-----|-----|
| R0-         | 260 | 379 | 65  | 65  | 37  |     |
| R0+         | 196 | 272 | 40  | 40  | 23  |     |
| RX-         | 129 | 174 | 25  | 25  | 10  |     |
| RX+         | 77  | 102 | 11  | 11  | 3   |     |
| R1-         | 46  | 65  | 4   | 4   | 2   |     |
| R1+         | 26  | 38  | 1   | 1   | 0   |     |
|             | 18  | 27  | 0   | 0   | 0   |     |

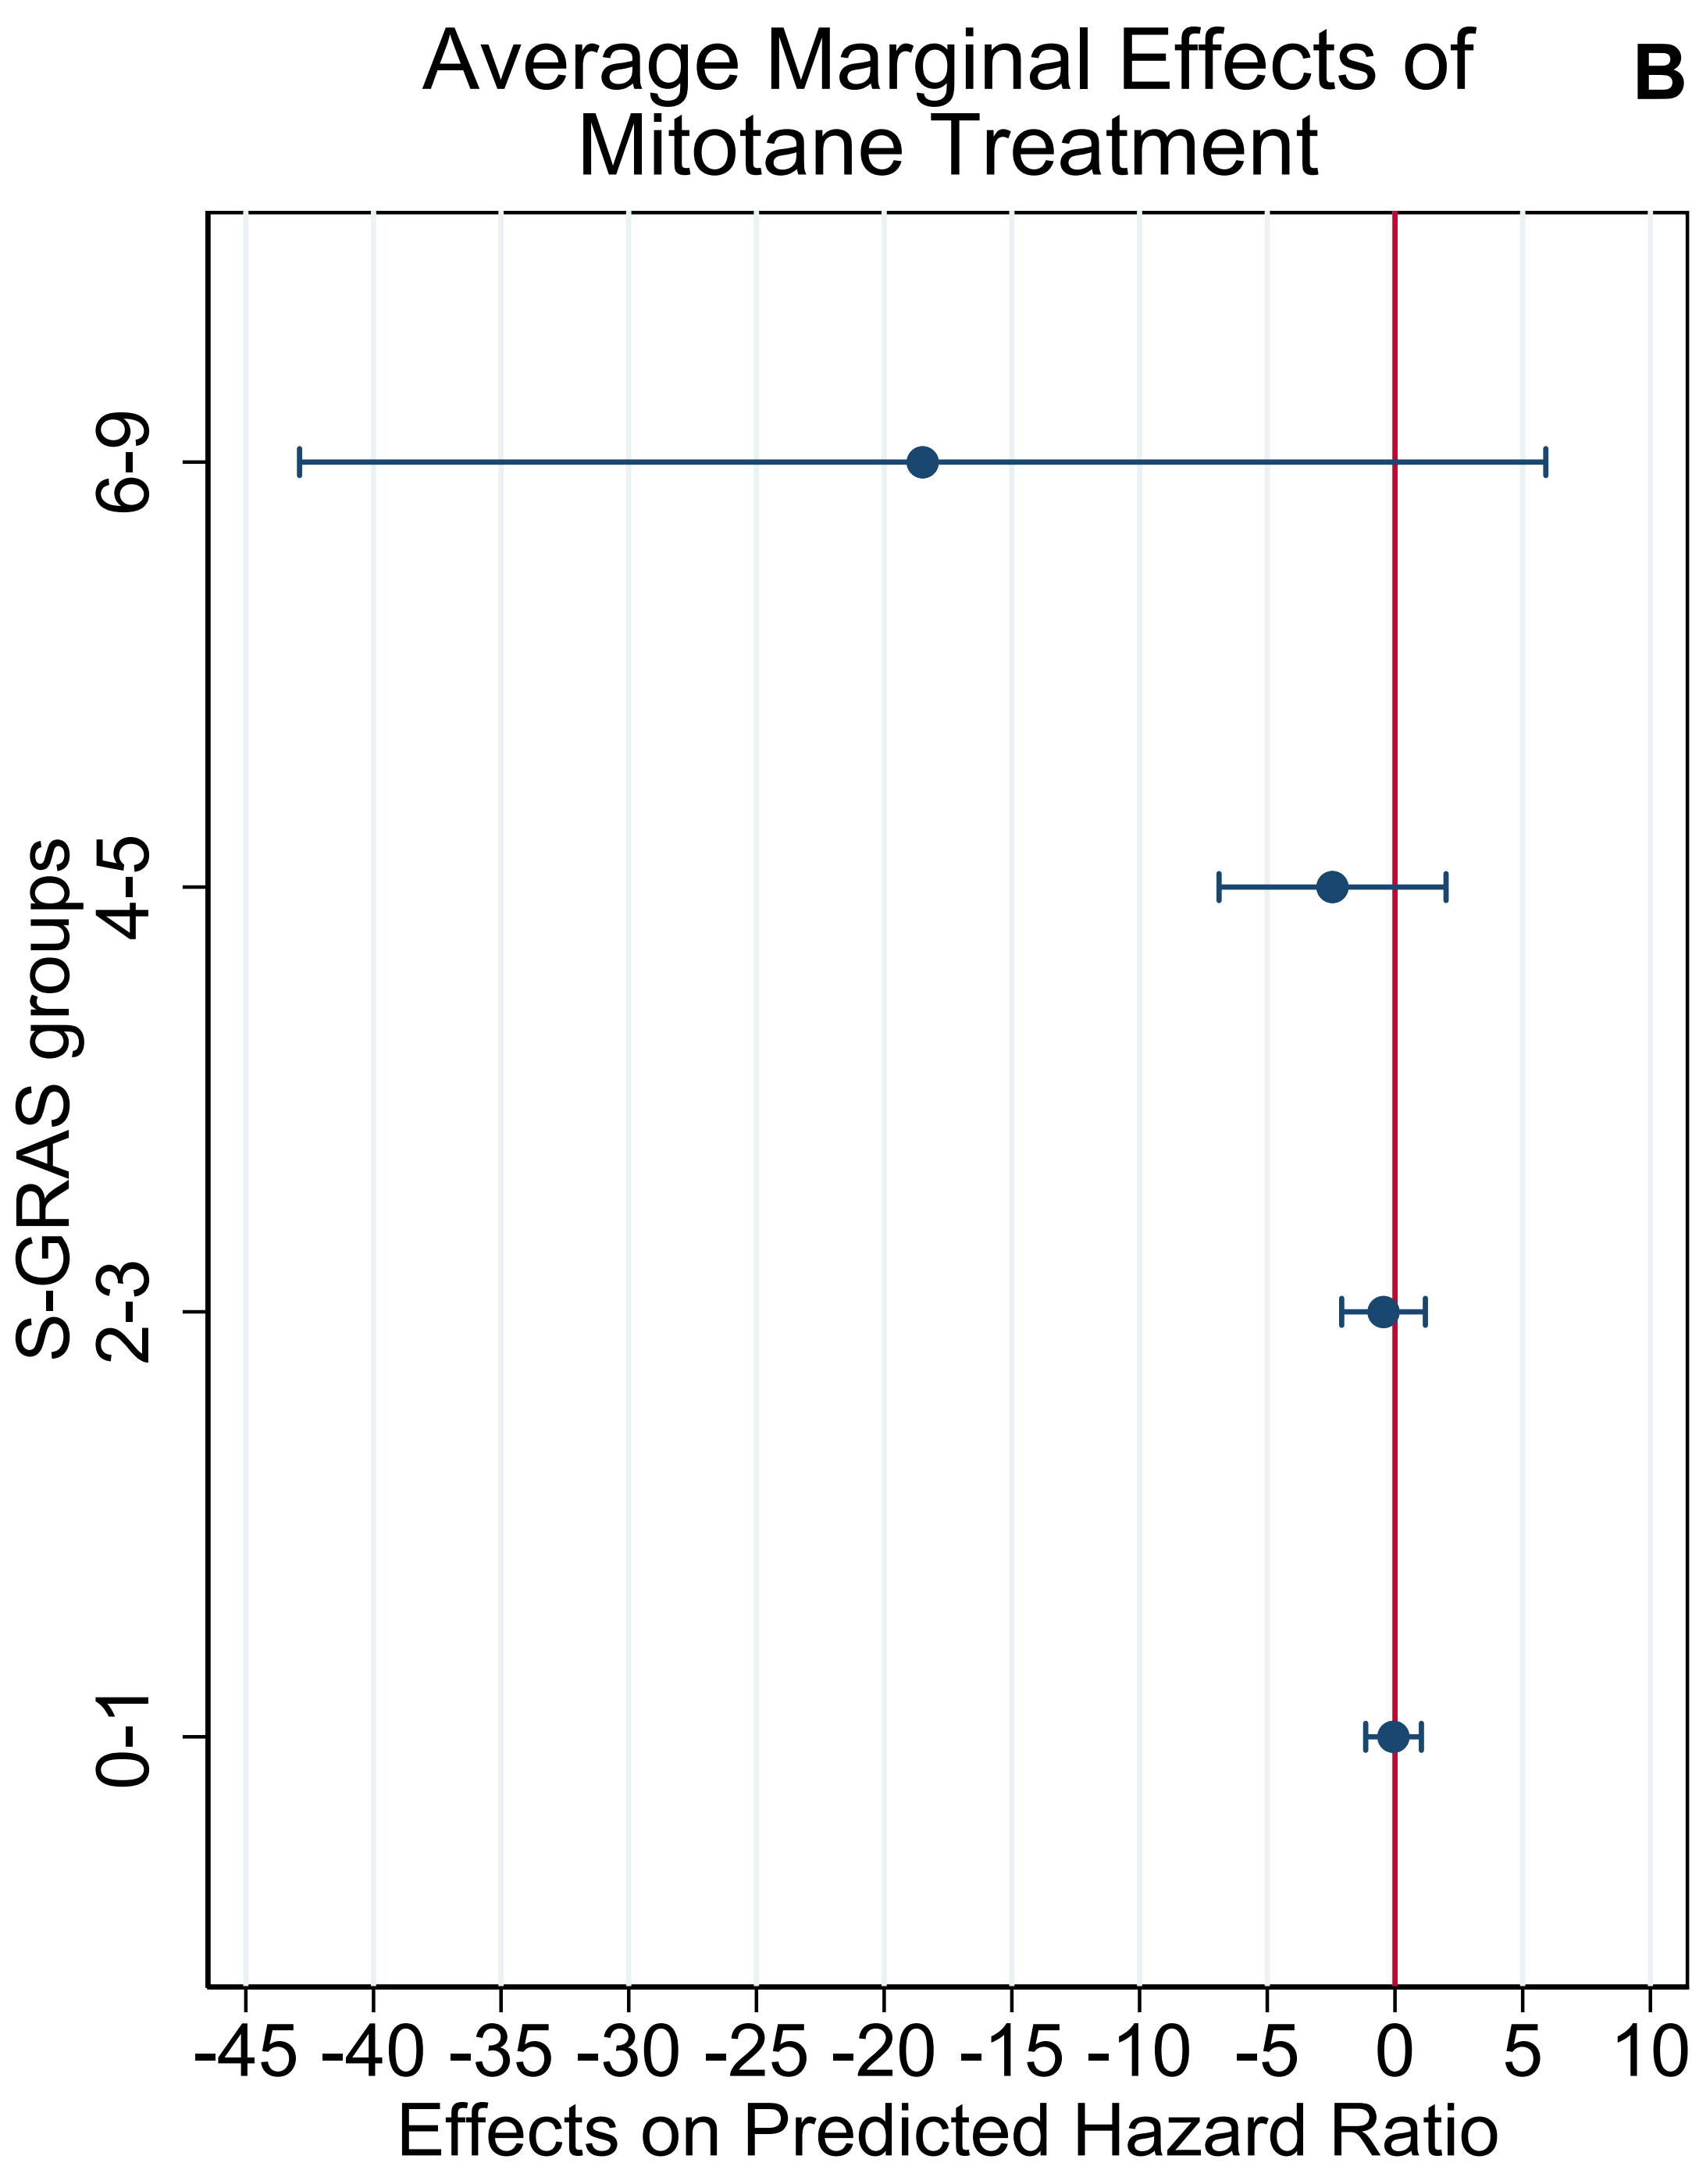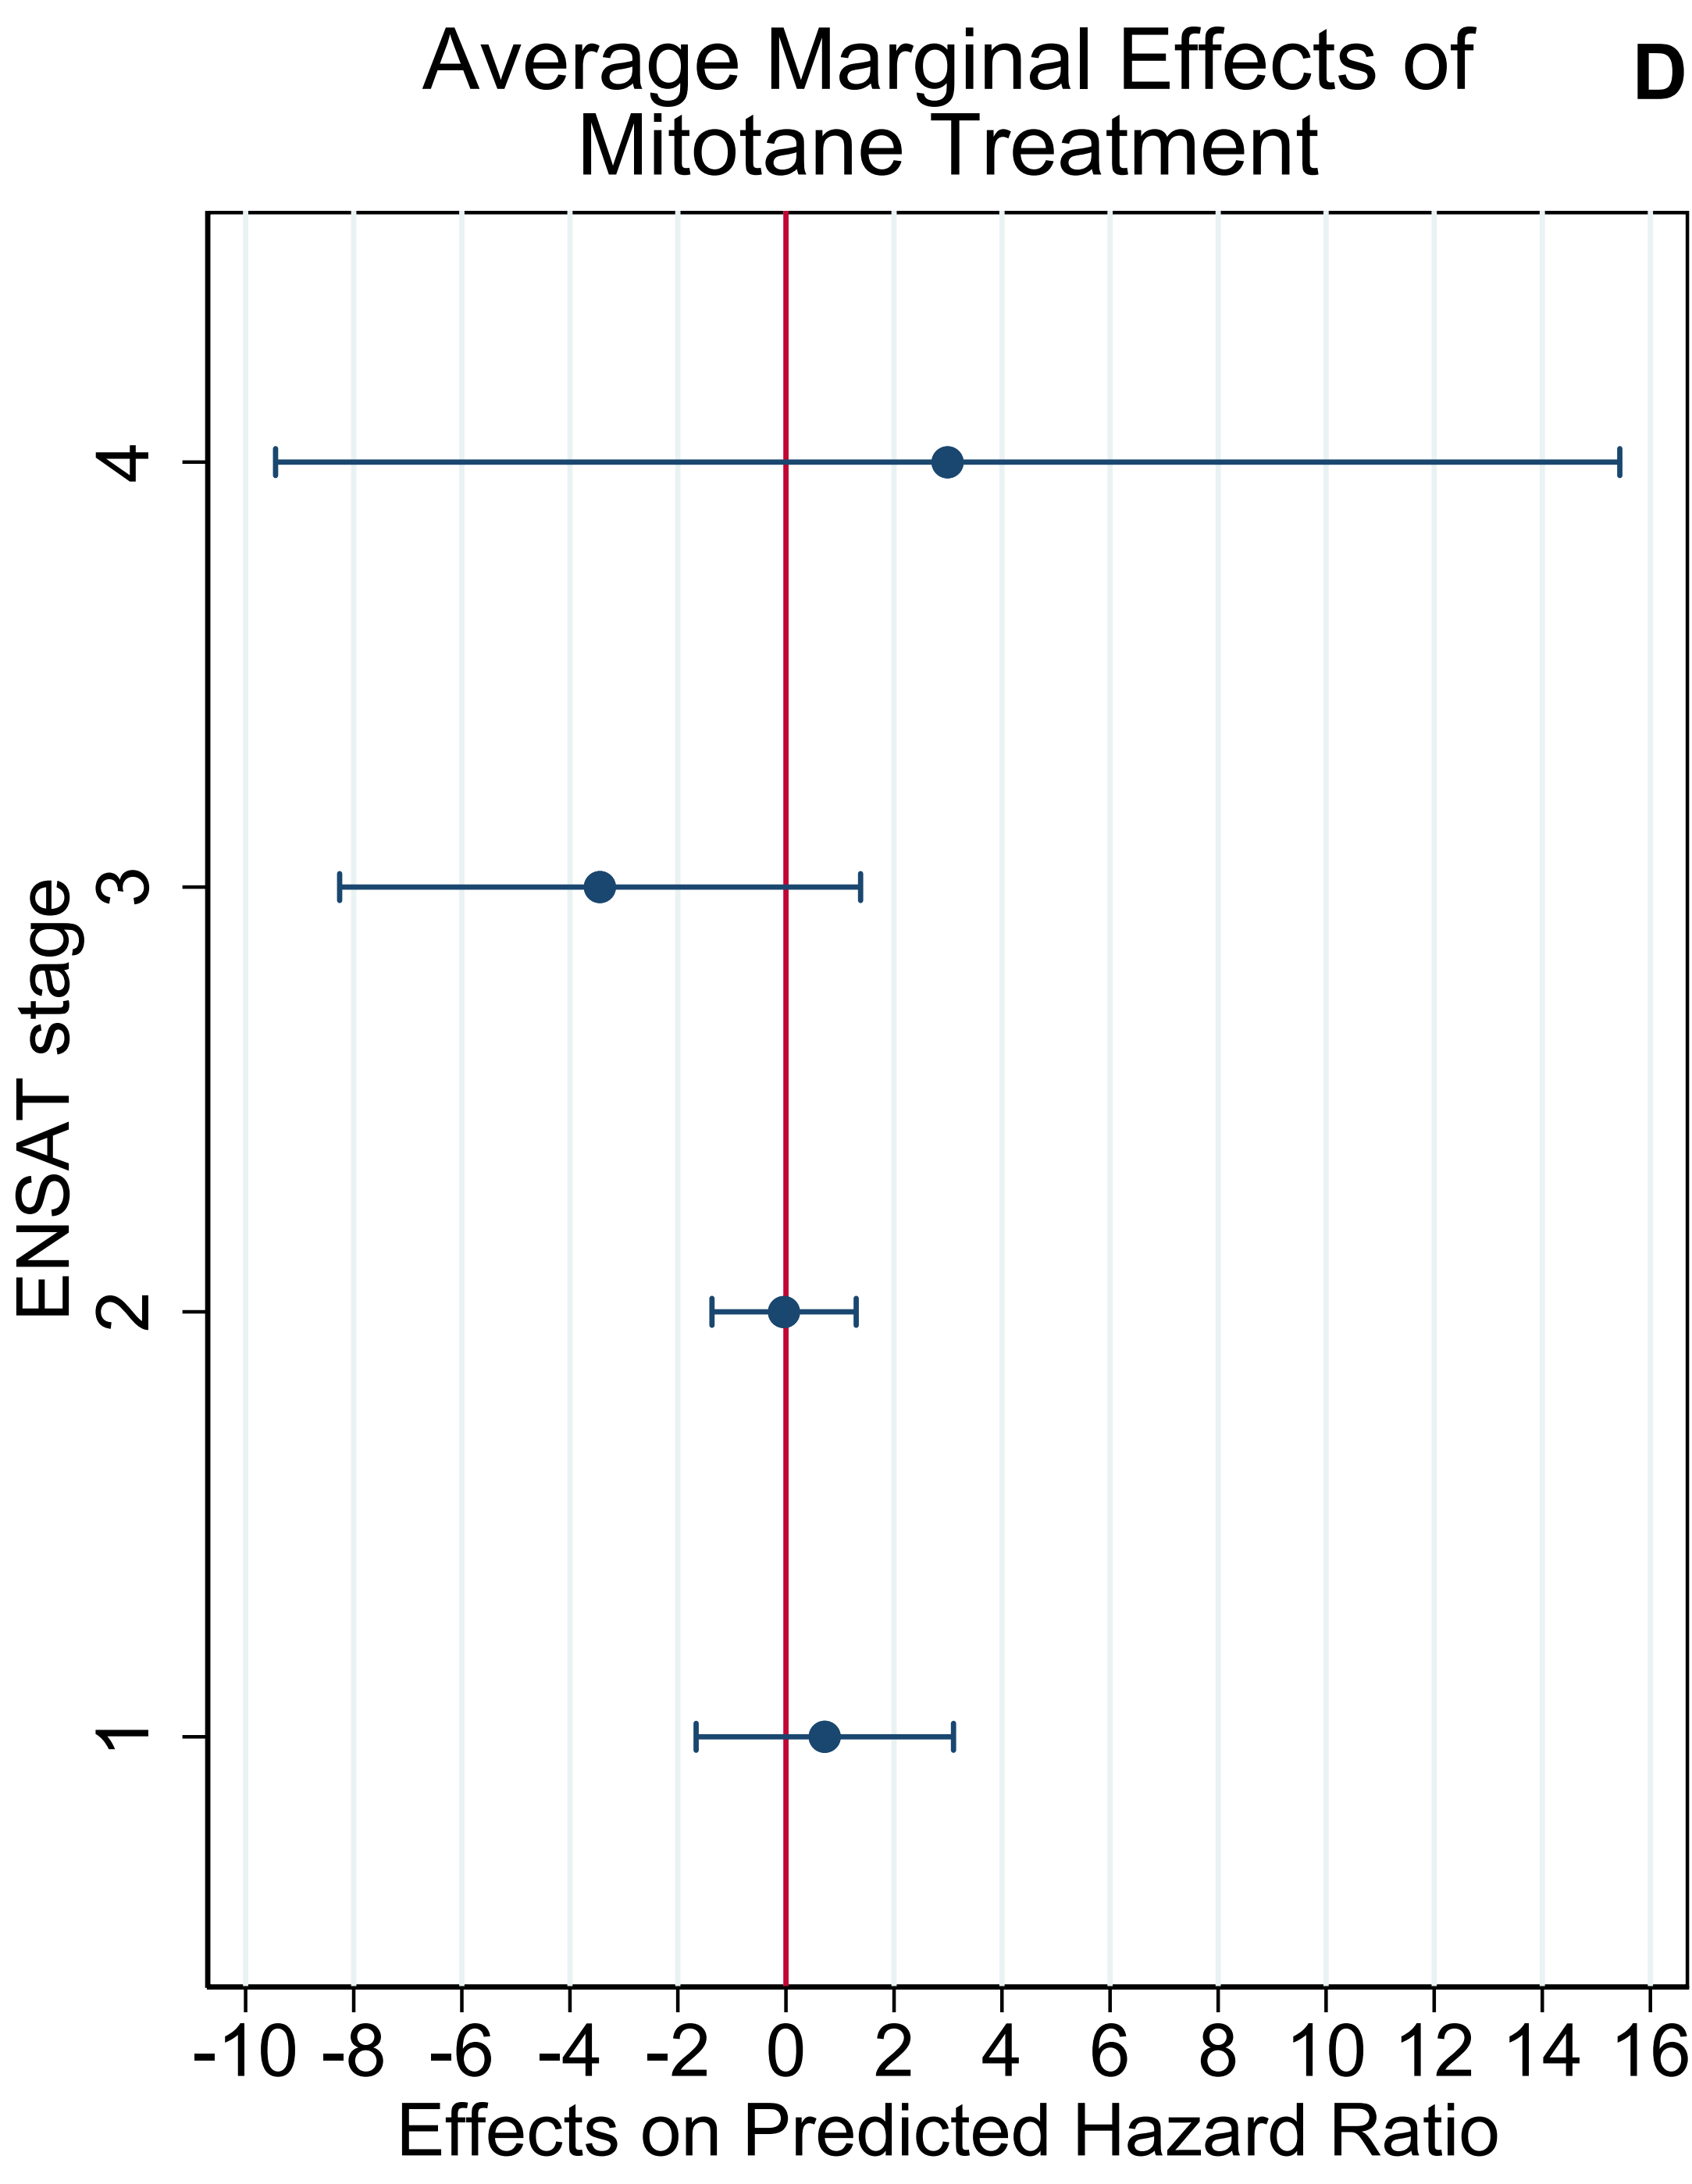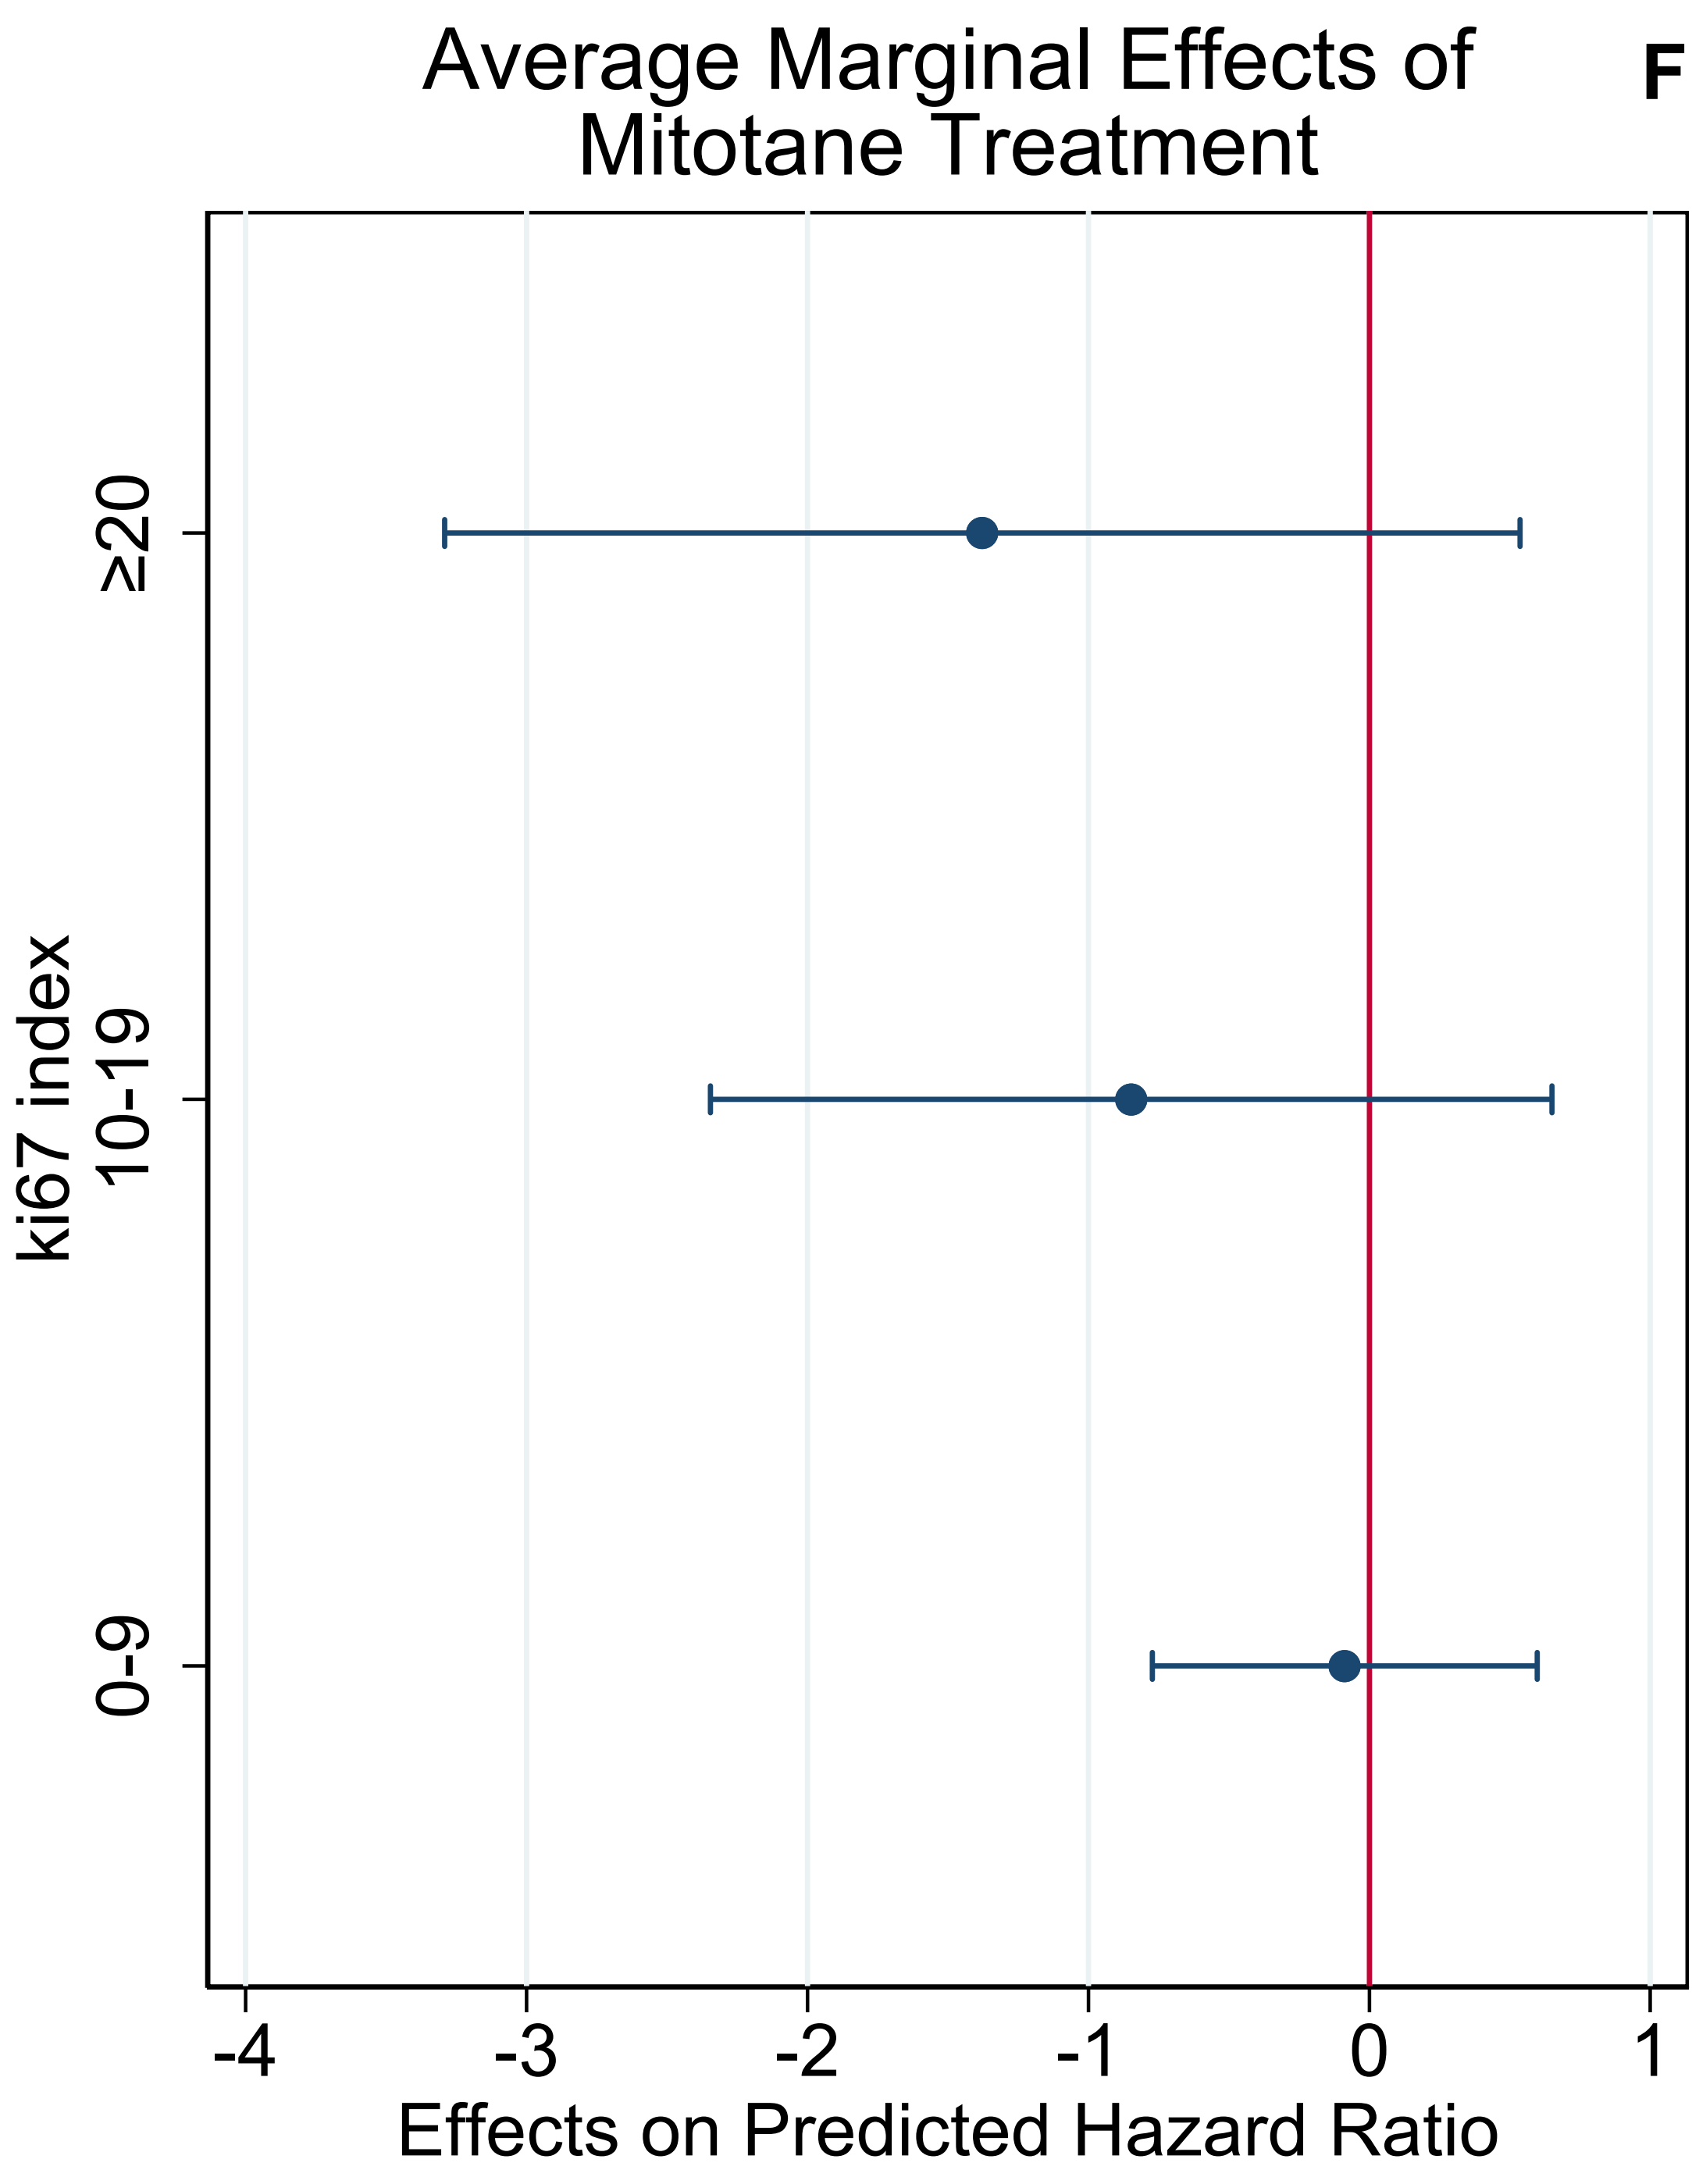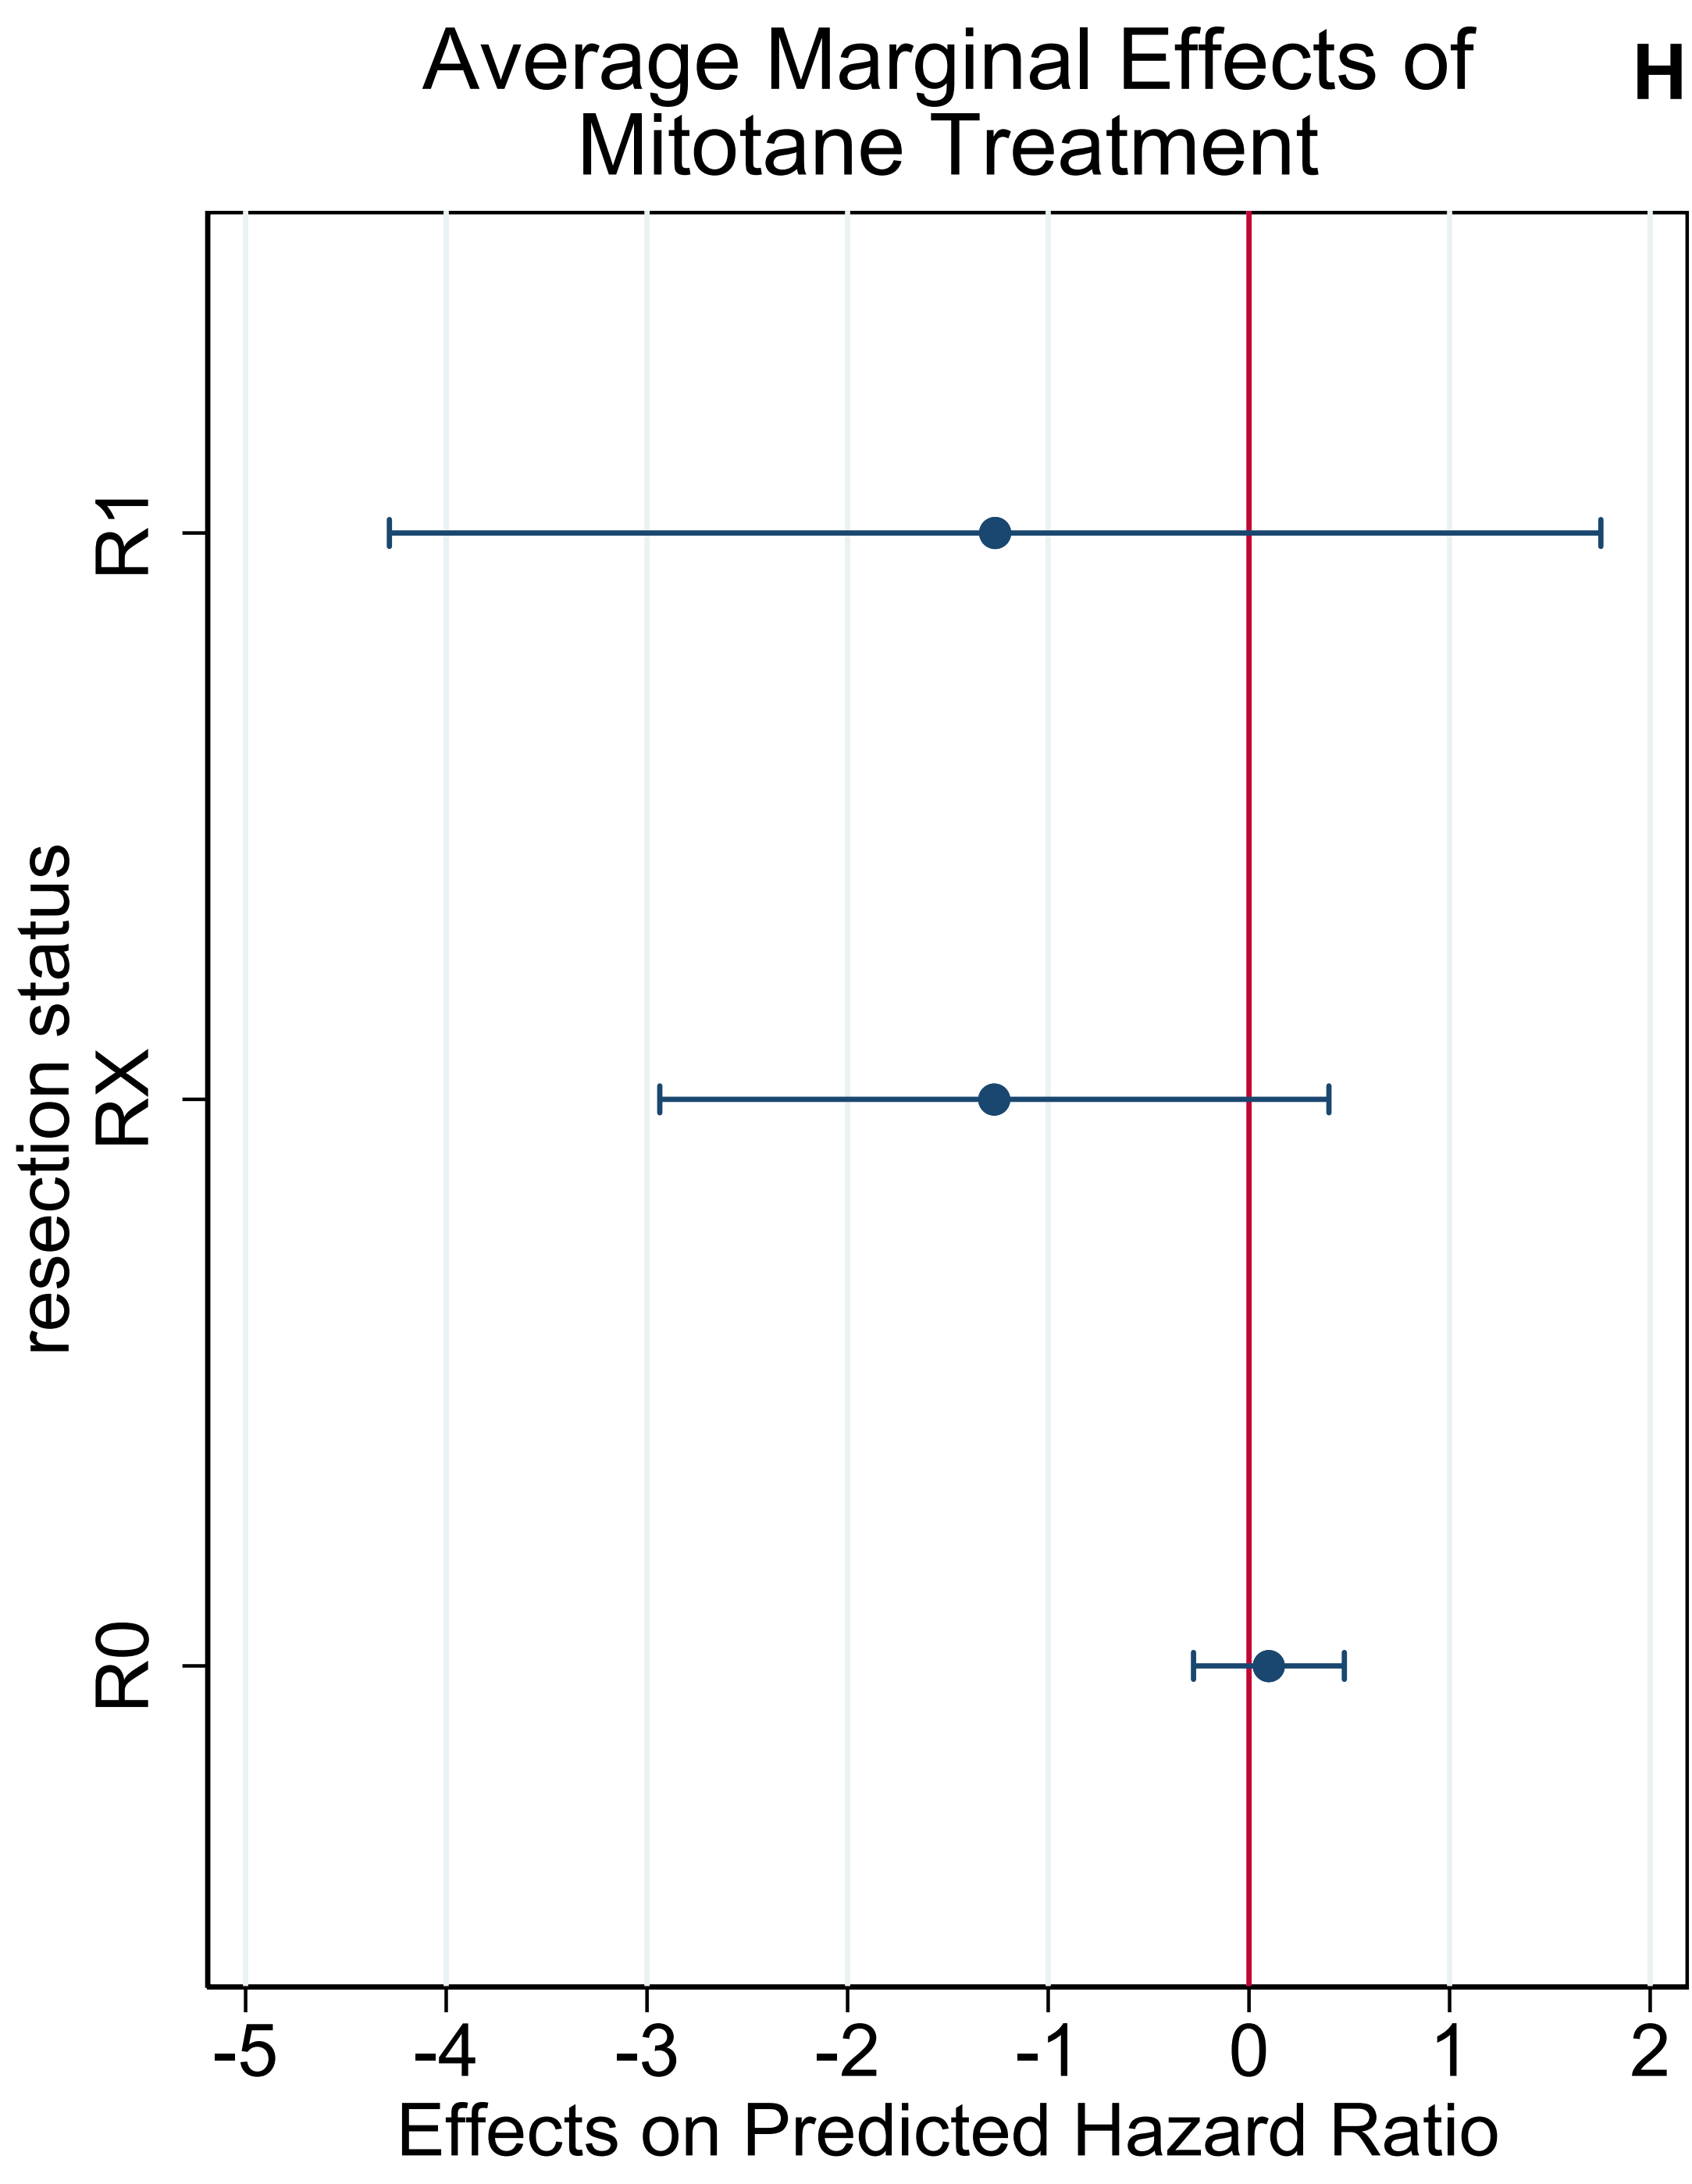

Supplement: supplementary_figure_2.pdf [file supplementary_figure_2.pdf]
