# Supplementary material for: S-GRAS score for prognostic classification of adrenocortical carcinoma: an international, multicenter ENSAT study
Source: PubMed Central journal article supplement (PMC8679848; doi:10.1530/eje-21-0510), 2021-10-27

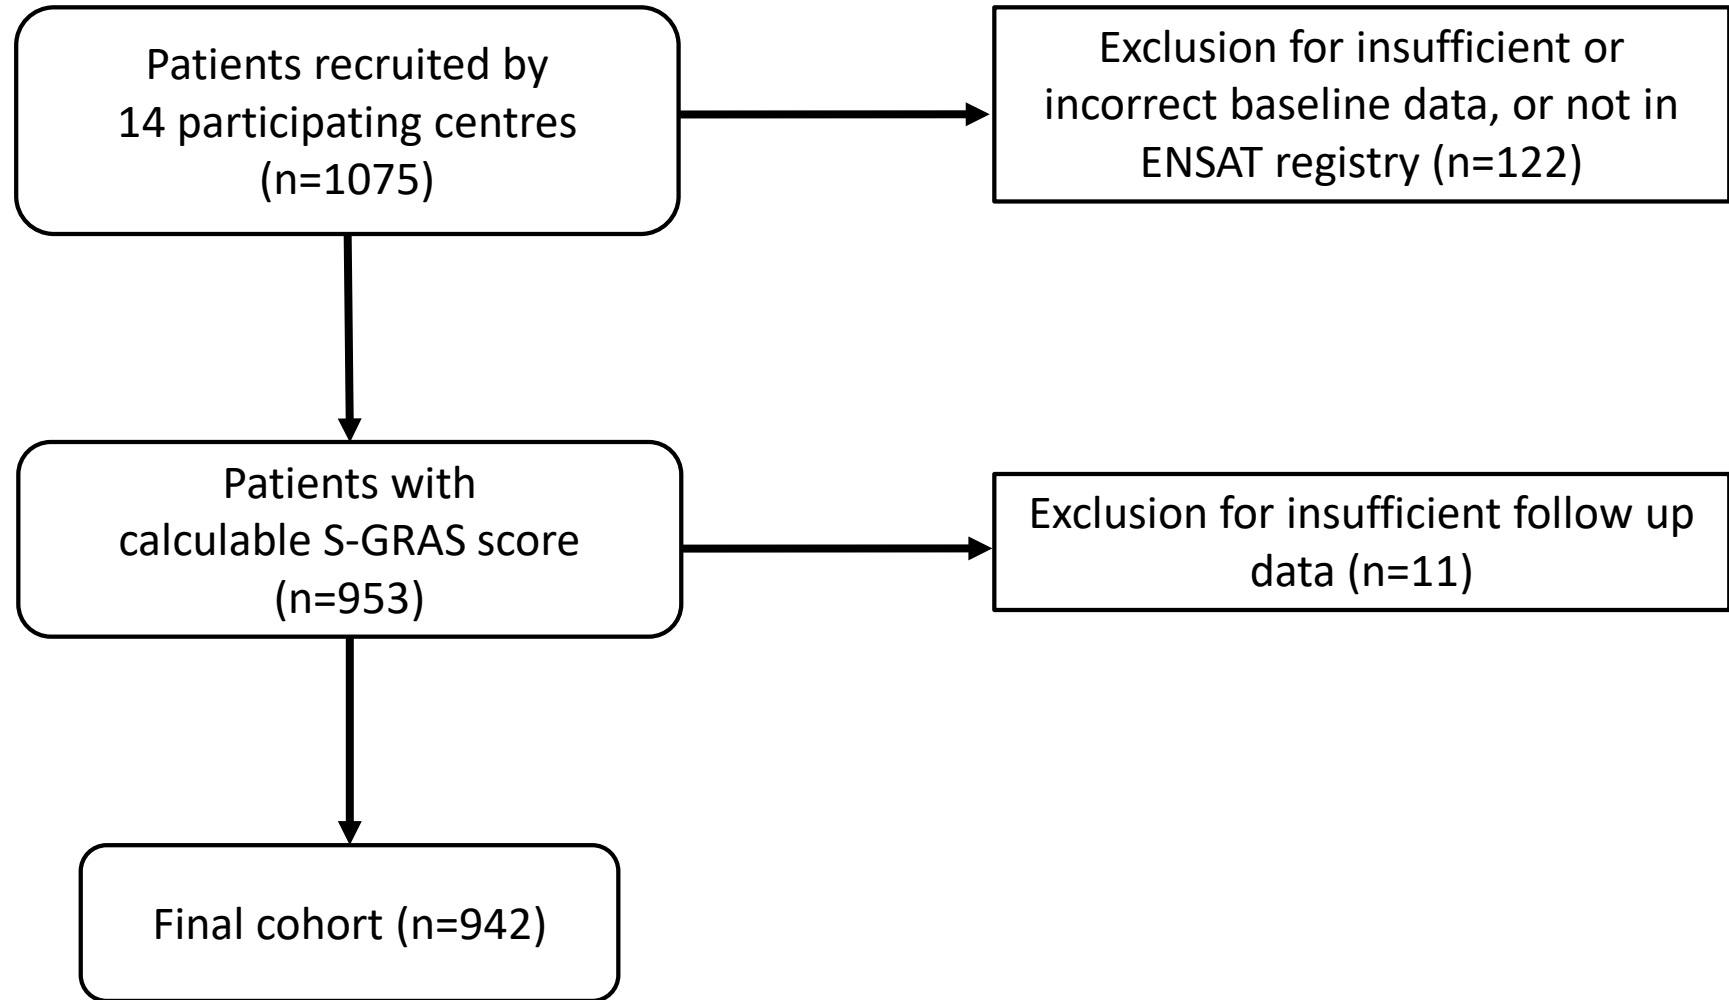

Supplement: supplementary_figure_1.pdf [file supplementary_figure_1.pdf]
