# Supplementary material for: S-GRAS score for prognostic classification of adrenocortical carcinoma: an international, multicenter ENSAT study
Source: PubMed Central journal article supplement (PMC8679848; doi:10.1530/eje-21-0510), 2021-10-27
Supplement: supplementary_table_2.pdf [file supplementary_table_2.pdf]

**Suppl Table 2. Calculation of S-GRAS score starting from five baseline clinical and histopathological characteristics.**

| <b>S-GRAS components</b>          | <b>Group</b> | <b>Points</b> |
|-----------------------------------|--------------|---------------|
| ENSAT tumour stage                | 1-2          | 0             |
|                                   | 3            | 1             |
|                                   | 4            | 2             |
| Grading (according to ki67 index) | 0-9%         | 0             |
|                                   | 10-19%       | 1             |
|                                   | ≥20%         | 2             |
| Resection status                  | R0           | 0             |
|                                   | RX           | 1             |
|                                   | R1           | 2             |
|                                   | R2           | 3             |
| Age                               | <50 yrs      | 0             |
|                                   | ≥50 yrs      | 1             |
| Symptoms                          | No           | 0             |
|                                   | Yes          | 1             |
