# Supplementary material for: S-GRAS score for prognostic classification of adrenocortical carcinoma: an international, multicenter ENSAT study
Source: PubMed Central journal article supplement (PMC8679848; doi:10.1530/eje-21-0510), 2021-10-27
Supplement: supplementary_table_3.pdf [file supplementary_table_3.pdf]

### Suppl Table 3: Sample size calculation

In the absence of any suitable D value for the S-GRAS score from previous literature, we used a number of possible values including the suggested value of  $D=1.4$ , which corresponds to Harrell's C index of 0.73. The table shows a range of sample sizes required for a validation study to detect a difference of 0.4, at alpha level 0.05 (two-sided) and 90% power for the PFS and DSS endpoints. The censoring proportion for the former and latter were 0.39 and 0.70 respectively.

| Endpoint | D=1.4<br>(Harrell's C =<br>0.73) | D=1.5<br>(Harrell's C =<br>0.75) | D=1.6<br>(Harrell's C =<br>0.76) | D=1.7<br>(Harrell's C =<br>0.77) | D=1.8<br>(Harrell's C =<br>0.78) |
|----------|----------------------------------|----------------------------------|----------------------------------|----------------------------------|----------------------------------|
| PFS      | 463                              | 492                              | 522                              | 555                              | 589                              |
| DSS      | 754                              | 794                              | 837                              | 884                              | 937                              |

PFS = progression-free survival; DSS = disease-specific survival.
