# Supplementary material for: S-GRAS score for prognostic classification of adrenocortical carcinoma: an international, multicenter ENSAT study
Source: PubMed Central journal article supplement (PMC8679848; doi:10.1530/eje-21-0510), 2021-10-27
Supplement: supplementary_table_4.pdf [file supplementary_table_4.pdf]

**Suppl Table 4. Demographics of the entire cohort of patients with adrenocortical carcinoma (n=942). Data collected at the time of diagnosis.**

| <b>Variable</b>                                | <b>Value</b> |
|------------------------------------------------|--------------|
| <b>Age, years</b>                              | 50 (38, 61)  |
| <b>Male, n(%)</b>                              | 359 (38)     |
| <b>Symptoms, n(%)</b>                          | 665 (71)     |
| <b>Symptom type, n(%)</b>                      |              |
| None                                           | 277 (29)     |
| Tumour mass                                    | 175 (19)     |
| Steroids                                       | 386 (41)     |
| Cancer-related                                 | 40 (4)       |
| Combinations of the above                      | 64 (7)       |
| <b>Hormone pattern, n(%)</b>                   |              |
| Non-functional                                 | 360 (38)     |
| Glucocorticoid excess                          | 202 (21)     |
| Androgen excess                                | 80 (8)       |
| Mineralocorticoid excess                       | 25 (3)       |
| Combinations of the above or other             | 196 (21)     |
| Unknown                                        | 79 (8)       |
| <b>ENSAT tumour stage at diagnosis, n(%)</b>   |              |
| 1                                              | 86 (9)       |
| 2                                              | 474 (50)     |
| 3                                              | 218 (23)     |
| 4                                              | 164 (17)     |
| <b>mENSAT tumour stage at diagnosis, n(%)*</b> |              |
| 4a                                             | 84 (9)       |
| 4b                                             | 35 (4)       |
| 4c                                             | 14 (1)       |
| Unknown                                        | 31 (3)       |
| <b>Ki67 index</b>                              | 18 (8, 30)   |
| <b>Ki67 index (categories), n(%)</b>           |              |
| 0-9                                            | 264 (28)     |
| 10-19                                          | 216 (23)     |
| ≥20                                            | 462 (49)     |

|                                                                                                                  |                       |
|------------------------------------------------------------------------------------------------------------------|-----------------------|
| <b>Resection status of primary tumour, n(%)</b>                                                                  |                       |
| R0                                                                                                               | 648 (69)              |
| RX                                                                                                               | 104 (11)              |
| R1                                                                                                               | 56 (6)                |
| R2                                                                                                               | 134 (14)              |
| <b>S-GRAS group, n(%)</b>                                                                                        |                       |
| 0-1                                                                                                              | 168 (18)              |
| 2-3                                                                                                              | 366 (39)              |
| 4-5                                                                                                              | 225 (24)              |
| 6-9                                                                                                              | 183 (19)              |
| <b>Disease recurrence, progress or death<sup>^</sup>, n(%)</b>                                                   | 572 (61)              |
| <b>Disease-specific death, n(%)</b>                                                                              | 281 (30)              |
| <b>Death of any cause, n(%)</b>                                                                                  | 295 (31)              |
| <b>Median progression-free survival, months (95% CI)</b>                                                         | 21 (19, 24)           |
| <b>Median disease-specific survival, months (95% CI)</b>                                                         | 123 (89, not reached) |
| <b>Median overall survival, months (95% CI)</b>                                                                  | 104 (84, 164)         |
| Continuous variables presented as median (and interquartile range).                                              |                       |
| *modified ENSAT staging for patients with metastatic disease at diagnosis (8) <sup>^</sup> disease-related death |                       |
| Median follow-up times: PFS: 49.63 months (95% CI 46.03, 58.77) and DSS: 45.00 months (95% CI 41.00, 48.00).     |                       |
