# Supplementary material for: S-GRAS score for prognostic classification of adrenocortical carcinoma: an international, multicenter ENSAT study
Source: PubMed Central journal article supplement (PMC8679848; doi:10.1530/eje-21-0510), 2021-10-27
Supplement: supplementary_table_5.pdf [file supplementary_table_5.pdf]

**Supplementary Table 5 – Multivariable Cox Regression model for progression-free survival (A) and disease-specific survival (B) with and without resection status, age and symptoms (RAS components) added to ENSAT tumour stage (S) and ki67 index (G).**

| <b>A) Multivariable cox regression model (PFS)</b> |                                  |                |                                           |                |
|----------------------------------------------------|----------------------------------|----------------|-------------------------------------------|----------------|
|                                                    | <b>ENSAT stage and ki67 only</b> |                | <b>All five variables in S-GRAS score</b> |                |
| <b>Variables</b>                                   | <b>Hazard ratio (95% CI)</b>     | <b>p-value</b> | <b>Hazard ratio (95% CI)</b>              | <b>p-value</b> |
| <b>ENSAT stage</b>                                 |                                  |                |                                           |                |
| 1                                                  | 1                                |                | 1                                         |                |
| 2                                                  | 1.75 (1.17, 2.61)                | 0.006          | 1.55 (1.04, 2.32)                         | 0.033          |
| 3                                                  | 3.09 (2.04, 4.67)                | <0.0001        | 2.64 (1.74, 4.01)                         | <0.0001        |
| 4                                                  | 5.23 (3.43, 7.98)                | <0.0001        | 2.77 (1.62, 4.76)                         | <0.0001        |
| <b>Ki67 index</b>                                  |                                  |                |                                           |                |
| 0-9                                                | 1                                |                | 1                                         |                |
| 10-19                                              | 2.08 (1.58, 2.73)                | <0.0001        | 1.99 (1.51, 2.62)                         | <0.0001        |
| ≥20                                                | 3.25 (2.55, 4.14)                | <0.0001        | 2.86 (2.24, 3.66)                         | <0.0001        |
| <b>Resection status</b>                            |                                  |                |                                           |                |
| R0                                                 |                                  |                | 1                                         |                |
| RX                                                 | -                                | -              | 1.55 (1.21, 2.00)                         | 0.001          |
| R1                                                 | -                                | -              | 1.66 (1.19, 2.31)                         | 0.003          |
| R2                                                 | -                                | -              | 2.03 (1.33, 3.09)                         | 0.001          |
| <b>Age</b>                                         |                                  |                |                                           |                |
| <50 years                                          |                                  |                | 1                                         |                |
| ≥50 years                                          | -                                | -              | 1.16 (0.98, 1.37)                         | 0.083          |
| <b>Symptoms</b>                                    |                                  |                |                                           |                |
| No                                                 |                                  |                | 1                                         |                |
| Yes                                                | -                                | -              | 1.55 (1.26, 1.90)                         | <0.0001        |

| <b>B) Multivariable cox regression model (DSS)</b> |                                  |                |                              |                |
|----------------------------------------------------|----------------------------------|----------------|------------------------------|----------------|
|                                                    | <b>ENSAT stage and ki67 only</b> |                | <b>All five variables</b>    |                |
| <b>Variables</b>                                   | <b>Hazard ratio (95% CI)</b>     | <b>p-value</b> | <b>Hazard ratio (95% CI)</b> | <b>p-value</b> |
| <b>ENSAT stage</b>                                 |                                  |                |                              |                |
| 1                                                  | 1                                |                | 1                            |                |
| 2                                                  | 2.03 (0.99, 4.19)                | 0.055          | 1.77 (0.86, 3.66)            | 0.124          |
| 3                                                  | 4.01 (1.93, 8.33)                | <0.0001        | 3.44 (1.64, 7.19)            | 0.001          |

|                         |                     |         |                   |         |
|-------------------------|---------------------|---------|-------------------|---------|
| 4                       | 10.32 (4.96, 21.50) | <0.0001 | 4.17 (1.77, 9.84) | 0.001   |
| <b>Ki67 index</b>       |                     |         |                   |         |
| 0-9                     | 1                   |         | 1                 |         |
| 10-19                   | 2.00 (1.27, 3.16)   | 0.003   | 2.01 (1.27, 3.17) | 0.003   |
| ≥20                     | 4.03 (2.73, 5.94)   | <0.0001 | 3.55 (2.38, 5.27) | <0.0001 |
| <b>Resection status</b> |                     |         |                   |         |
| R0                      |                     |         | 1                 |         |
| RX                      | -                   | -       | 1.31 (0.88, 1.95) | 0.185   |
| R1                      | -                   | -       | 1.65 (1.05, 2.60) | 0.030   |
| R2                      | -                   | -       | 2.79 (1.63, 4.77) | <0.0001 |
| <b>Age</b>              |                     |         |                   |         |
| <50 years               |                     |         | 1                 |         |
| ≥50 years               | -                   | -       | 1.50 (1.18, 1.91) | 0.001   |
| <b>Symptoms</b>         |                     |         |                   |         |
| No                      |                     |         | 1                 |         |
| Yes                     | -                   | -       | 2.20 (1.59, 3.05) | <0.0001 |
