# Supplementary material for: S-GRAS score for prognostic classification of adrenocortical carcinoma: an international, multicenter ENSAT study
Source: PubMed Central journal article supplement (PMC8679848; doi:10.1530/eje-21-0510), 2021-10-27
Supplement: supplementary_table_6.pdf [file supplementary_table_6.pdf]

**Suppl Table 6. Univariate survival analysis: median disease-specific survival (DSS), percentage survival at 24 and 60 months, hazard ratios and discrimination analysis of single prognostic variables and S-GRAS scoring.**

| Variables                      | N   | % survival at 24 months | % survival at 60 months | Median DSS, months (95% CI) | Hazard ratio (95% CI) | p-value (HR) | Harrell's C index (95% CI) | p-values (Harrell's C) | Royston-Sauerbrei's R <sup>2</sup> <sub>D</sub> statistic |
|--------------------------------|-----|-------------------------|-------------------------|-----------------------------|-----------------------|--------------|----------------------------|------------------------|-----------------------------------------------------------|
| <b>ENSAT stage</b>             |     |                         |                         |                             |                       |              |                            |                        |                                                           |
| 1                              | 86  | 97.4 (89.9, 99.3)       | 87.8 (75.5, 94.2)       | NR                          | 1                     | Reference    | 0.72 (0.69, 0.75)          | <0.0001*<br><0.0001**  | 0.35 (0.28, 0.42)                                         |
| 2                              | 474 | 90.2 (86.8, 92.8)       | 72.9 (67.2, 77.8)       | 248.8 (131.2, NR)           | 2.6 (1.3, 5.3)        | 0.010        |                            |                        |                                                           |
| 3                              | 218 | 75.3 (68.1, 81.1)       | 53.6 (44.6, 61.8)       | 66.0 (53.0, 123.0)          | 5.6 (2.7, 11.6)       | <0.0001      |                            |                        |                                                           |
| 4                              | 164 | 45.5 (36.6, 53.9)       | 21.3 (12.9, 31.1)       | 19.0 (16.5, 30.0)           | 16.8 (8.1, 34.7)      | <0.0001      |                            |                        |                                                           |
| <b>Ki67 index</b>              |     |                         |                         |                             |                       |              |                            |                        |                                                           |
| 0-9                            | 264 | 97.2 (93.8, 98.7)       | 87.3 (81.0, 91.7)       | 248.8 (131.2, NR)           | 1                     | Reference    | 0.69 (0.66, 0.71)          | <0.0001*<br><0.0001**  | 0.31 (0.22, 0.39)                                         |
| 10-19                          | 216 | 85.6 (79.3, 90.0)       | 72.4 (63.8, 79.3)       | 163.9 (123.0, NR)           | 2.2 (1.4, 3.5)        | 0.001        |                            |                        |                                                           |
| ≥20                            | 462 | 68.0 (63.0, 72.4)       | 41.7 (35.6, 47.7)       | 49.6 (36.5, 57.0)           | 5.6 (3.8, 8.2)        | <0.0001      |                            |                        |                                                           |
| <i>Ki67 (continuous)</i>       | 942 | -                       | -                       | -                           | 1.03 (1.02, 1.04)     | <0.0001      | 0.71 (0.68, 0.74)          | <0.0001*,<br><0.0001** | 0.21 (0.15, 0.27)                                         |
| <b>Resection status</b>        |     |                         |                         |                             |                       |              |                            |                        |                                                           |
| R0                             | 648 | 89.5 (86.5, 91.8)       | 73.1 (68.3, 77.2)       | 248.8 (131.2, NR)           | 1                     | Reference    | 0.70 (0.67, 0.73)          | <0.0001*<br><0.0001**  | 0.36 (0.29, 0.42)                                         |
| RX                             | 104 | 77.1 (66.1, 84.9)       | 63.8 (51.2, 73.9)       | 72.8 (63.8, NR)             | 1.9 (1.3, 2.8)        | 0.002        |                            |                        |                                                           |
| R1                             | 56  | 69.5 (53.9, 80.7)       | 25.7 (9.9, 44.9)        | 44.5 (28.4, 60.0)           | 3.2 (2.1, 4.9)        | <0.0001      |                            |                        |                                                           |
| R2                             | 134 | 38.8 (29.2, 48.2)       | 13.0 (5.8, 23.3)        | 17.0 (14.6, 23.0)           | 8.1 (6.1, 10.8)       | <0.0001      |                            |                        |                                                           |
| <b>Age</b>                     |     |                         |                         |                             |                       |              |                            |                        |                                                           |
| <50 years                      | 466 | 82.1 (77.8, 85.5)       | 64.6 (58.8, 69.8)       | 147.5 (99.0, NR)            | 1                     | Reference    | 0.53 (0.50, 0.56)          | <0.0001*<br><0.0001**  | 0.02 (0.00, 0.05)                                         |
| ≥50 years                      | 476 | 78.3 (73.9, 82.1)       | 59.0 (52.9, 64.7)       | 89.0 (66.0, NR)             | 1.3 (1.0, 1.6)        | 0.034        |                            |                        |                                                           |
| <i>Age (continuous)</i>        | 942 | -                       | -                       | -                           | 1.01 (1.00, 1.02)     | 0.033        | 0.54 (0.50, 0.58)          | <0.0001*,<br><0.0001** | 0.01 (0.00, 0.04)                                         |
| <b>Symptoms</b>                |     |                         |                         |                             |                       |              |                            |                        |                                                           |
| No                             | 277 | 93.1 (88.7, 95.8)       | 78.1 (70.5, 83.9)       | 248.8 (147.5, NR)           | 1                     | Reference    | 0.60 (0.58, 0.62)          | <0.0001*<br><0.0001**  | 0.16 (0.07, 0.25)                                         |
| Yes                            | 665 | 75.1 (71.2, 78.4)       | 55.4 (50.4, 60.1)       | 84.0 (63.0, 123.0)          | 2.5 (1.8, 3.5)        | <0.0001      |                            |                        |                                                           |
| <b>S-GRAS group</b>            |     |                         |                         |                             |                       |              |                            |                        |                                                           |
| 0-1                            | 168 | 99.2 (94.3, 99.9)       | 93.5 (86.8, 96.9)       | 248.8 (147.5, NR)           | 1                     | Reference    | 0.77 (0.74, 0.79)          | Reference 1*           | 0.46 (0.39, 0.52)                                         |
| 2-3                            | 366 | 91.8 (88.0, 94.4)       | 72.0 (65.3, 77.7)       | 163.9 (123.0, NR)           | 3.4 (1.9, 6.3)        | <0.0001      |                            |                        |                                                           |
| 4-5                            | 225 | 76.1 (69.2, 81.7)       | 56.1 (47.1, 64.2)       | 73.0 (55.8, NR)             | 7.8 (4.2, 14.5)       | <0.0001      |                            |                        |                                                           |
| 6-9                            | 183 | 41.9 (33.6, 50.0)       | 12.8 (6.4, 21.6)        | 20.0 (16.6, 25.6)           | 27.3 (14.9, 50.0)     | <0.0001      |                            |                        |                                                           |
| <b>S-GRAS individual score</b> |     |                         |                         |                             |                       |              |                            |                        |                                                           |
| 0                              | 36  | 100                     | 95.2 (70.7, 99.3)       | NR                          | 0.3 (0.0, 2.5)        | 0.285        | 0.79 (0.76, 0.82)          | Reference 2**          | 0.45 (0.39, 0.50)                                         |
| 1                              | 132 | 98.9 (92.7, 99.9)       | 93.0 (85.0, 96.8)       | 248.8 (147.5, NR)           | 1                     | Reference    |                            |                        |                                                           |
| 2                              | 155 | 93.5 (87.3, 96.7)       | 80.2 (70.1, 87.2)       | 163.9 (131.2, NR)           | 2.1 (1.0, 4.2)        | 0.045        |                            |                        |                                                           |
| 3                              | 211 | 90.5 (85.2, 94.0)       | 66.0 (56.6, 73.8)       | 123.0 (71.0, NR)            | 3.6 (1.9, 6.9)        | <0.0001      |                            |                        |                                                           |
| 4                              | 153 | 79.9 (71.7, 85.9)       | 60.4 (49.5, 69.6)       | 73.0 (56.5, NR)             | 5.7 (2.9, 11.0)       | <0.0001      |                            |                        |                                                           |
| 5                              | 72  | 68.1 (54.2, 78.5)       | 44.6 (27.9, 60.1)       | 33.0 (29.0, NR)             | 10.00 (4.9, 20.3)     | <0.0001      |                            |                        |                                                           |
| 6                              | 32  | 66.4 (43.6, 81.7)       | 24.1 (6.9, 46.9)        | 35.0 (21.0, 52.4)           | 13.4 (6.2, 28.9)      | <0.0001      |                            |                        |                                                           |
| 7                              | 39  | 42.0 (23.7, 59.2)       | 33.6 (14.6, 53.9)       | 22.6 (15.0, NR)             | 20.3 (9.6, 42.9)      | <0.0001      |                            |                        |                                                           |
| 8                              | 75  | 37.6 (25.3, 49.9)       | 9.3 (2.8, 20.7)         | 16.6 (13.2, 24.0)           | 27.1 (14.0, 52.6)     | <0.0001      |                            |                        |                                                           |

|                                                                                                                                                                                                                                                                                |    |                   |   |                  |                   |         |  |  |  |
|--------------------------------------------------------------------------------------------------------------------------------------------------------------------------------------------------------------------------------------------------------------------------------|----|-------------------|---|------------------|-------------------|---------|--|--|--|
| 9                                                                                                                                                                                                                                                                              | 37 | 30.8 (14.7, 48.4) | - | 15.9 (8.5, 23.0) | 39.5 (19.2, 81.5) | <0.0001 |  |  |  |
| NR, not reached (= median survival not reached i.e. percentage survival remained >50% so this value and/or its 95% confidence intervals cannot be computed). *p-values comparing the variable with the S-GRAS group. **p-values comparing the variable with the S-GRAS scores. |    |                   |   |                  |                   |         |  |  |  |
