# Supplementary material for: S-GRAS score for prognostic classification of adrenocortical carcinoma: an international, multicenter ENSAT study
Source: PubMed Central journal article supplement (PMC8679848; doi:10.1530/eje-21-0510), 2021-10-27
Supplement: supplementary_table_7.pdf [file supplementary_table_7.pdf]

**Suppl Table 7. Demographic data for patients with adrenocortical carcinoma in the adjuvant mitotane cohort (n=795)**

| Variable                                                                                   | No mitotane adjuvant | Mitotane adjuvant | P value      |
|--------------------------------------------------------------------------------------------|----------------------|-------------------|--------------|
| <b>N</b>                                                                                   | 314                  | 481               | -            |
| <b>Age, years</b>                                                                          | 51 (39, 61)          | 49 (38, 60)       | 0.0824       |
| <b>Male, n(%)</b>                                                                          | 131 (41.7)           | 175 (36.4)        | 0.131        |
| <b>Symptoms at diagnosis, n(%)</b>                                                         | 198 (63.1)           | 338 (70.3)        | <b>0.034</b> |
| <b>Symptom type, n(%)</b>                                                                  |                      |                   |              |
| None                                                                                       | 116 (36.9)           | 143 (29.7)        | 0.257        |
| Tumour mass                                                                                | 57 (18.2)            | 88 (18.3)         |              |
| Steroids                                                                                   | 114 (36.3)           | 198 (41.2)        |              |
| Cancer-related                                                                             | 10 (3.2)             | 22 (4.6)          |              |
| Combinations of the above                                                                  | 17 (5.4)             | 30 (6.2)          |              |
| <b>Hormone pattern, n(%)</b>                                                               |                      |                   |              |
| Non-functional                                                                             | 131 (41.7)           | 192 (39.9)        | 0.739        |
| Glucocorticoid excess                                                                      | 59 (18.8)            | 101 (21.0)        |              |
| Androgen excess                                                                            | 26 (8.3)             | 40 (8.3)          |              |
| Combinations of the above or other                                                         | 69 (21.9)            | 114 (23.7)        |              |
| Unknown                                                                                    | 29 (9.2)             | 34 (7.1)          |              |
| <b>ENSAT tumour stage at diagnosis, n(%)</b>                                               |                      |                   |              |
| 1                                                                                          | 47 (15.0)            | 38 (8.0)          | <b>0.017</b> |
| 2                                                                                          | 172 (54.8)           | 291 (60.5)        |              |
| 3                                                                                          | 80 (25.5)            | 130 (27.0)        |              |
| 4                                                                                          | 15 (4.8)             | 22 (4.6)          |              |
| <b>Ki67 index</b>                                                                          | 10 (5, 20)           | 18 (10, 30)       |              |
| <b>Ki67 index (categories), n(%)</b>                                                       |                      |                   |              |
| 0-9                                                                                        | 141 (44.9)           | 112 (23.3)        | < 0.0001     |
| 10-19                                                                                      | 68 (21.7)            | 130 (27.0)        |              |
| ≥20                                                                                        | 105 (33.4)           | 239 (49.7)        |              |
| <b>Resection status of primary tumour, n(%)</b>                                            |                      |                   |              |
| R0                                                                                         | 260 (82.8)           | 379 (78.8)        | 0.357        |
| RX                                                                                         | 36 (11.5)            | 65 (13.5)         |              |
| R1                                                                                         | 18 (5.73)            | 37 (7.7)          |              |
| <b>S-GRAS group, n(%)</b>                                                                  |                      |                   |              |
| 0-1                                                                                        | 98 (31.21)           | 68 (14.1)         | < 0.0001     |
| 2-3                                                                                        | 122 (38.9)           | 238 (49.5)        |              |
| 4-5                                                                                        | 76 (24.2)            | 144 (29.94)       |              |
| 6-9                                                                                        | 18 (5.7)             | 31 (6.4)          |              |
| <b>Disease recurrence, progress or death*, n(%)</b>                                        | 176 (56.1)           | 267 (55.5)        | 0.881        |
| <b>Disease-specific death, n(%)</b>                                                        | 80 (25.5)            | 112 (23.3)        | 0.480        |
| <b>Death of any cause, n(%)</b>                                                            | 83 (26.4)            | 121 (25.2)        | 0.687        |
| Continuous variables presented as median (and interquartile range).*disease-related death. |                      |                   |              |
