# Supplementary material for: S-GRAS score for prognostic classification of adrenocortical carcinoma: an international, multicenter ENSAT study
Source: PubMed Central journal article supplement (PMC8679848; doi:10.1530/eje-21-0510), 2021-10-27
Supplement: supplementary_table_8.pdf [file supplementary_table_8.pdf]

**Suppl Table 8. Univariate survival analysis: median disease-specific survival (DSS), hazard ratios and discrimination analysis of single prognostic variables and S-GRAS scoring in patients with adrenocortical carcinoma treated or not treated with mitotane adjuvant (n=795).**

| Variables               | Mitotane treatment | N   | Median DSS, months (95% CI) | Hazard ratio (95% CI) | p-value (HR) | HR difference - untreated vs treated (95% CI) | p-value (difference) | Harrell's C index (95% CI) | Royston-Sauerbrei's R <sup>2</sup> <sub>D</sub> statistic |
|-------------------------|--------------------|-----|-----------------------------|-----------------------|--------------|-----------------------------------------------|----------------------|----------------------------|-----------------------------------------------------------|
| <b>ENSAT stage</b>      |                    |     |                             |                       |              |                                               |                      |                            |                                                           |
| 1                       | No                 | 47  | NR (97.4, NR)               | 1                     | Reference    |                                               |                      | 0.69 (0.64, 0.75)          | 0.24 (0.12, 0.37)                                         |
| 2                       |                    | 172 | NR (99.0, NR)               | 3.2 (1.1, 9.0)        | 0.027        |                                               |                      |                            |                                                           |
| 3                       |                    | 80  | 54.57 (34.0, 71.0)          | 8.9 (3.2, 25.2)       | <0.0001      |                                               |                      |                            |                                                           |
| 4                       |                    | 15  | NR (14.6, NR)               | 10.8 (2.9, 40.4)      | <0.0001      |                                               |                      |                            |                                                           |
| 1                       | Yes                | 38  | NR                          | 1.7 (0.4, 6.9)        | 0.444        | 0.72 (-1.66, 3.10)                            | 0.555                | 0.61 (0.56, 0.66)          | 0.14 (0.06, 0.25)                                         |
| 2                       |                    | 291 | 147.5 (127.0, NR)           | 3.2 (1.2, 8.8)        | 0.026        | -0.04 (-1.37, 1.30)                           | 0.958                |                            |                                                           |
| 3                       |                    | 130 | 123.0 (56.5, NR)            | 5.5 (2.0, 15.4)       | 0.001        | -3.44 (-8.26, 1.38)                           | 0.162                |                            |                                                           |
| 4                       |                    | 22  | 46.0 (18.0, 84.0)           | 13.8 (4.5, 42.4)      | <0.0001      | 2.99 (-9.45, 15.44)                           | 0.637                |                            |                                                           |
| <b>Ki67 index</b>       |                    |     |                             |                       |              |                                               |                      |                            |                                                           |
| 0-9                     | No                 | 141 | NR (99.0, NR)               | 1                     | Reference    |                                               |                      | 0.72 (0.67, 0.77)          | 0.30 (0.16, 0.43)                                         |
| 10-19                   |                    | 68  | 163.9 (54.6, NR)            | 2.7 (1.4, 5.3)        | 0.004        |                                               |                      |                            |                                                           |
| ≥20                     |                    | 105 | 48.0 (34.0, 73.0)           | 5.3 (3.0, 9.4)        | <0.0001      |                                               |                      |                            |                                                           |
| 0-9                     | Yes                | 112 | 248.8 (131.2, NR)           | 0.9 (0.4, 1.9)        | 0.811        | -0.09 (-0.77, 0.60)                           | 0.802                | 0.65 (0.61, 0.69)          | 0.25 (0.12, 0.38)                                         |
| 10-19                   |                    | 130 | 147.5 (123.0, NR)           | 1.8 (1.0, 3.5)        | 0.063        | -0.85 (-2.35, 0.65)                           | 0.267                |                            |                                                           |
| ≥20                     |                    | 239 | 69.0 (56.5, NR)             | 3.9 (2.3, 6.7)        | <0.0001      | -1.38 (-3.29, 0.54)                           | 0.158                |                            |                                                           |
| <b>Resection status</b> |                    |     |                             |                       |              |                                               |                      |                            |                                                           |
| R0                      | No                 | 260 | NR (163.9, NR)              | 1                     | Reference    |                                               |                      | 0.61 (0.55, 0.66)          | 0.20 (0.09, 0.33)                                         |
| RX                      |                    | 36  | 63.8 (30.0, 83.1)           | 2.8 (1.6, 5.0)        | 0.001        |                                               |                      |                            |                                                           |
| R1                      |                    | 18  | 41.0 (14.6, 50.0)           | 4.2 (2.1, 8.2)        | <0.0001      |                                               |                      |                            |                                                           |
| R0                      | Yes                | 379 | 147.5 (123.0, NR)           | 1.1 (0.8, 1.6)        | 0.585        | 0.10 (-0.28, 0.48)                            | 0.602                | 0.56 (0.51, 0.60)          | 0.08 (0.01, 0.19)                                         |
| RX                      |                    | 65  | 73.0 (68.0, NR)             | 1.5 (0.9, 2.7)        | 0.151        | -1.27 (-2.94, 0.40)                           | 0.136                |                            |                                                           |
| R1                      |                    | 37  | 52.4 (28.4, NR)             | 2.9 (1.6, 5.2)        | <0.0001      | -1.26 (-4.28, 1.75)                           | 0.412                |                            |                                                           |
| <b>S-GRAS group</b>     |                    |     |                             |                       |              |                                               |                      |                            |                                                           |
| 0-1                     | No                 | 98  | NR                          | 1                     | Reference    |                                               |                      | 0.76 (0.71, 0.81)          | 0.42 (0.30, 0.53)                                         |
| 2-3                     |                    | 122 | 163.9 (71.0, NR)            | 3.6 (1.6, 8.3)        | 0.002        |                                               |                      |                            |                                                           |
| 4-5                     |                    | 76  | 41.0 (28.6, NR)             | 9.6 (4.2, 21.9)       | <0.0001      |                                               |                      |                            |                                                           |
| 6-9                     |                    | 18  | 18.1 (11.0, 35.0)           | 34.0 (13.5, 86.0)     | <0.0001      |                                               |                      |                            |                                                           |
| 0-1                     | Yes                | 68  | 248.8 (147.5, NR)           | 1.0 (0.3, 3.0)        | 0.923        | -0.05 (-1.14, 1.03)                           | 0.921                | 0.68 (0.64, 0.73)          | 0.27 (0.16, 0.37)                                         |
| 2-3                     |                    | 238 | NR (123.0, NR)              | 3.2 (1.4, 7.1)        | 0.004        | -0.45 (-2.09, 1.19)                           | 0.592                |                            |                                                           |
| 4-5                     |                    | 144 | 73.0 (55.8, NR)             | 7.1 (3.2, 15.8)       | <0.0001      | -2.44 (-6.89, 2.00)                           | 0.281                |                            |                                                           |
| 6-9                     |                    | 31  | 30.4 (21.0, 63.0)           | 15.5 (6.4, 38.0)      | <0.0001      | -18.49 (-42.89, 5.91)                         | 0.137                |                            |                                                           |

HR, hazard ratio; NR, not reached (= median survival not reached i.e. percentage survival remained >50% so this value and/or its 95% confidence intervals cannot be computed).
