# Supplementary material for: S-GRAS score for prognostic classification of adrenocortical carcinoma: an international, multicenter ENSAT study
Source: PubMed Central journal article supplement (PMC8679848; doi:10.1530/eje-21-0510), 2021-10-27
Supplement: supplementary_table_9.pdf [file supplementary_table_9.pdf]

**Suppl Table 9. Overview of different available models for prognostication in patients with ACC compared to the present series.**

| <b>Study</b>         | <b>N</b>   | <b>Outcome</b>                   | <b>Predictors</b>                                                                           | <b>Harrell's C-index</b>                |
|----------------------|------------|----------------------------------|---------------------------------------------------------------------------------------------|-----------------------------------------|
| Kim 2016             | 148        | RFS and OS<br>(curative surgery) | Tumour size, nodal status, T stage, cortisol secretion, capsular invasion, resection status | RFS 0.74<br>OS 0.70                     |
| Li 2018              | 751        | DSS and OS                       | Age, year of diagnosis, histology grade, tumour stage, chemotherapy                         | DSS 0.67<br>OS 0.68                     |
| Kong 2019            | 404        | OS<br>(surgery)                  | Age, T stage, N stage, M stage                                                              | OS 0.72                                 |
| Ettaieb 2020         | 160        | DSS                              | Age, modified ENSAT stage, resection status (+/- ki67 index)                                | DSS 0.77                                |
| Baechle 2021         | 243        | OS and RFS                       | Age, symptoms (hypersecretion), grade (Weiss score or ki67), resection status               | Not Available                           |
| <b>Present study</b> | <b>942</b> | <b>PFS and DSS<br/>(surgery)</b> | <b>Age, symptoms, ENSAT stage, ki67 index, resection status<br/>(S-GRAS score)</b>          | <b>PFS 0.71/0.73*<br/>DSS 0.77/0.79</b> |

RFS=recurrence-free survival, OS=overall survival, DSS= disease-specific survival,

PFS=progression-free survival, \*S-GRAS as groups and as continuous variable
