# Supplementary material for: S-GRAS score for prognostic classification of adrenocortical carcinoma: an international, multicenter ENSAT study
Source: PubMed Central journal article supplement (PMC8679848; doi:10.1530/eje-21-0510), 2021-10-27
Supplement: supplementary_table_10.pdf [file supplementary_table_10.pdf]

**Supplementary Table 10. Overview of our hypothetically proposed “S-GRAS-based recommendation” as compared with the current European ACC Guidelines (Fassnacht et al EJE 2018).**

|                                                                                                 | N (% of total)         | SGRAS 0-1 (n) | S GRAS 2-3 (n) | S-GRAS 4-5 (n)    | S-GRAS 6-9 (n)      |
|-------------------------------------------------------------------------------------------------|------------------------|---------------|----------------|-------------------|---------------------|
| S-GRAS-based “recommendation” →                                                                 |                        | No mitotane   | No mitotane    | Adjuvant mitotane | Adjuvant EDP-M/EP-M |
| Recommendation in ACC guidelines ↓                                                              |                        |               |                |                   |                     |
| R0 and ENSAT 1-2 and ki67 ≤10%<br>Consider mitotane or surveillance                             | 242 (26%)              | <b>157</b>    | <b>85</b>      | <b>0</b>          | <b>0</b>            |
| R0 and ENSAT 3-4 OR<br>ENSAT 1-2 AND ki67 > 10%<br>Adjuvant mitotane                            | 177 (19%)<br>345 (37%) | 1<br>7        | 81<br>196      | 92<br>139         | 3<br>3              |
| R0 and ENSAT 3-4 AND ENSAT 1-2 AND ki67 > 10%<br>Adjuvant mitotane                              | 116 (12%)              | 0             | 31             | 82                | 3                   |
| RX / R1<br>Adjuvant mitotane + consider radiotherapy (ev. chemotherapy in higher risk patients) | 160 (17%)              | 3             | 35             | 76                | 180                 |

Legend:

Green shading boxes = “our suggestion” is a less aggressive approach (surveillance vs adjuvant mitotane).

**Light grey shading boxes and bold text** = agreement between guidelines and “our suggestion” for adjuvant mitotane.

Light red shading = “our suggestion” favours a more aggressive adjuvant treatment (adjuvant chemotherapy).

This table shows that in the large majority of the cases, our proposed “S-GRAS-based recommendations” are in agreement with the current guidelines. However, there are subgroups of patients for which, according to the S-GRAS stratification, we would theoretically not suggest adjuvant mitotane.
